# Supplementary material for: Analysis of large mutations in BARD1 in patients with breast and/or ovarian cancer: the Polish population as an example
Source: PubMed Central journal article supplement (PMC4439969; doi:10.1038/srep10424), 2015-05-21
Supplement: srep10424-s1.pdf [file srep10424-s1.pdf]

## Supplementary Materials for:

# Analysis of large mutations in *BARD1* in patients with breast and/or ovarian cancer: the Polish population as an example

Katarzyna Klonowska<sup>a</sup>, Magdalena Ratajska<sup>c</sup>, Karol Czubak<sup>a</sup>, Alina Kuzniacka<sup>c</sup>, Izabela Brozek<sup>c</sup>, Magdalena Koczkowska<sup>c</sup>, Marcin Sniadecki<sup>c</sup>, Jaroslaw Debniak<sup>c</sup>, Dariusz Wydra<sup>c</sup>, Magdalena Balut<sup>c</sup>, Maciej Stukan<sup>d</sup>, Agnieszka Zmienko<sup>a,b</sup>, Beata Nowakowska<sup>c</sup>, Irmgard Irminger-Finger<sup>f</sup>, Janusz Limon<sup>c</sup> and Piotr Kozlowski<sup>a,b\*</sup>

<sup>a</sup>European Centre for Bioinformatics and Genomics, Institute of Bioorganic Chemistry, Polish Academy of Sciences, Noskowskiego 12/14, 61-704 Poznan, Poland

<sup>b</sup>Poznan University of Technology, Pl. Marii Sklodowskiej-Curie 5, 60-965 Poznan, Poland

<sup>c</sup>Medical University of Gdansk, Marii Sklodowskiej-Curie 3a, 80-211 Gdansk, Poland

<sup>d</sup>Gdynia Oncology Centre, Powstania Styczniowego 1, 81-519 Gdynia, Poland

<sup>e</sup>Department of Medical Genetics, Institute of Mother and Child, Kasprzaka 17A, 01-211 Warsaw, Poland

<sup>f</sup>University Hospitals of Geneva, HUG, Geneva, Switzerland

\*corresponding author: Piotr Kozlowski - kozlowp@yahoo.com

tel: +48 616653100, fax: +48 618520532, IChB PAS, Noskowskiego 12/14,  
61-704 Poznan, Poland

## Supplementary data

### The *BARD1* sequence with the positions of the MLPA probes marked.

The NM\_000465 *BARD1* sequence (Mar 2006 NCBI36/hg18 assembly) with the locations of the MLPA probes marked. The 5' half-probes are marked in yellow, and the 3' half-probes are marked in green. The ID of each probe is shown next to the *BARD1* sequence. The exons are indicated in blue, the low complexity/repetitive regions are labeled with lower case letters and the positions of the SNPs are indicated in red.

BARD1

>chr2:215296520-215387673 (reverse complement)

```
GAAGTGGCCTTTCCAGTGCATAATACCATAATTAATAATCAGAGAAGAA
TTAATATAAAGGTAAGAATTTGTGAGATATCTTTACACTCCTTGGGAGTA
GAGTCTGGGTATTAAGGATATCCCATTTTGCTTGTATATATGTTTATCC
AAGTGAATATGAGGAAGATTTACCTCTTTGTAAAACACTTCATAACACAA
CAGAAGAGAAAAACAGCATTTTGACTGTTTTCAACAAACCATTATATAAGC
CTGAAGATCAGAAAAGAATTCAAGGCTGGAGATGCCTTCATAGCATGGTA
ACACTACAGAGGGTAACTGAAGCAGTCGGGGGGATGAGGGTTTAAAGTGGG
CCTGGAGAGAGGAGGATAGGTAATAAGGCTGAAGCAAGCTTATCTGCAT
GCCTCAGAATCCACCCAGGACTACAGTGTTACAGTGGGGGAGGGATGGAT
GATTTTGTAGTCTAGGATACTTGGGAATACTGCTTACTAGGAAGAGAACAG
ACTAGGAGTGAAATGGAGCAACAAGTCTAAACTTTTATGTACACAGGAGG
TCCTTGCAAGGAAAACCTCTGAAAAAGAAATGATAACCATTTAGCCCTTTT
AAAGTGAGAAGAAGAGGACATTGTTTCATGTCCTAAACCATGGCTTTACTG
AGACCCTGCTGATGGCTGGAGTTCCCTGCAGAACTTTTTCTCTGGGACAA
GAATTCCAGGATTTTACACATTGTTGGATGTACCCCATGGGAGAAGGAAT
GTGCCCTTGAAACTCAGGATCCAGGGTTAAGAGGAAGAGTTGGTTCAAAA
CAAACATCCCATCTCCACTAAAGGCAAAGCACCAGCAAGCTAAGCTGTAG
AAAAGCAAGGCTGGAAGGAAGAAAATGGAATGGGAAGTTGCACATCGGAG
AGTAACCCTGCTTATTCTCTTTATGAGTTTCATTATGGCCACTATTAAC
AGCTGCCACGAATGTCATGACCCCTGGGGAGATGGAACAGGACAATGGCA
GAAGAAAGGAAAAAAGCAAACAACAGTAGAAAAGAACTAATTGTATCTGC
ATCATAAATTCATTTAATAGCATGGTATGAATAAGCCAGTTATAAATGTTT
GGTCCCAAATCATTTTACCAAATGTGAAATTTTCATTTACTCTGATCAC
AGTTAAATTTGTGCCcaagtatagtggcgcacgcctgtagccccagctac
tcggcaggggtgaggcacgagaatcgcttgaaccccttgaacgcaggaggc
agaggccacactgagctgagattgtgccactgcactccagcctgggtgac
agagcaagactctgtctcCCCCGCCCCCGCAAAAAAAAAAACTGTGCC
TTAATAAAAAAAAAAATTGATAAAAATGTTTCAGTGTTATTCTTTAGTAAATA
AAGCATTAAACAGTACTGATTATATATAATCATCCTCAATCagttaccatt
tactgagtacttatgggtgatgtgattttacatttaattcttatttaataag
tcctccaaatctaccgataaatattatccccattttgcagacaaggaaa
ctaagtctcagagagcttaaggcttgggttaaatcacacaattatttagt
gaaagtgggattataagtaggacaatctatctcctgaaatcctcaattta
ccccattaacaccatagtatctctcCAGGTTTTAACGTTTTAAGTTTTCG
TTCTTTTTCTTTTTCTTTCTTTTCCttttgtgttttttttttttttttt
tttttgagacagtctcgctcogttgcccaggctggagggcagcgcacca
tcttgccctcactgcaaccttcacctcctggctccagctatttttctgcc
tcagcctcctgaggaactgggattacaggtgatgccaccacacctggct
aatttttatatttttagtagagacggggtttcacatgtagccaggctg
gccttgaactcctgacctcaagtgatccacctgccttggcctcccaaagt
gctgggattacaagtgctgagccaccgtgctgaccCATTTTAAGTTTTCT
AGAACTTGATTTCTCCACGCTCAACAAAGAGTAAGCACTGGCTTAACAG
GACTAATAAGGACTAACTTCTTAGGTGCCTCTGAGTTAAAAAAAAAAAAAT
GGTTCGTTTGTGTGCTATCATAGTTTCAGTTAAAACATTTAATAAAGCCT
TATTTAGTTGTGCTTATTCTAactaaccaagtgtgtgattttggccaagt
catttaaacctccttgagttttCATTATTTAGTGGAGCTACAAggcacagt
ggctcacacctgtaatcccagcattttgggaggctgaggcagaagaattg
cttgaggtcaggagttctagagcagcctggccaacatagagagaccctgt
ctctacaaataattaaaaaaaaaattatccaggcatgggtgggggtgcacct
gcacaggtcccagctactcgggaggctgaggtgggagggctcacttgagcc
```

caggagttcaaagctgcagtgagctgagatcgtaccactgtactccatcc  
tgggcaacagagtgagaccttgtcccaaaaaaCCCTCAAAAGACCAAAA  
ATATAATTTACTGgggccattaataatcaaaaagatctgggttaatattc  
tgccactgttggtatctgtgcctccatcctggacaagtATGCttttcttt  
ttacaaatcttacttttctctaaagatgggggtcttgctatggtgcctag  
gctggccttgaacccccggggctgaagtgattctcctgcctcagcctcca  
agtagctaggactacaggtatgtgcTGAGCCccttgggcaagtaaattaa  
gatctctgagccacacctgcctcctctTATTAAAGAGCActgtcttagct  
gtataacaaaatactataatctagatggcttaagcaacagaaatttgct  
atatttctggagtctagaagtctgagattagcgtgccagtatgactgggt  
tttggggagggccctcttcttttgggttcttggctgtgcctcatgtggg  
gagagagagagaactctctcttcttacaaggtcattaacccccatcatggg  
ggctctgccctcataacccccatctaaatctaactaccaccaaaaggtccc  
ctccaaatactatcacgttgggggttacaacttttaatatatgaatttggg  
ggtgacTACAGataactaatgcccatttcatagggctcctataaggctt  
aaggcaggtattaacataggaaagcacttaagctgggtctggcTTGGGT  
AGGTAGttcaatgattcaacaacactgagcacctacctggagccaagca  
ctgcatgtgccacatgaagcgatattgggaaatgagtcacatgcagccaa  
tctctggccttttggagggttttgaactagaaggggacacgcacataatcg  
tatgtgtgtgatctacatacacaggtgatatgatgcacctgagagaatc  
cagtctaggaactagggaaacctttaaggagtgatacttcagctgtattc  
tgaaggatgaggaatggagaggaggccaattccaggttccaaagtgaatc  
tttgcgcaaaagccatgaggcagcaaggtgcaggggcttttaatgacct  
agggaaacgcactgtgggggttgggacctgatggccagaggaggttttgac  
aagaggctagtcaaagagCAGAGAAAAACTTTAAGGAGTTTAAAGAAAGG  
GAAGTGCCACGATGAGTTTTGTGTTTTGGAAATGTTTTAGGCGGCCACACC  
GCAGTCTCGGGACTGGCTGGGACCTGGATAGACACTTGGATATCAGCTAG  
AAAGCTACGCACGGAAACCAAGCGAGGACGAGGCAACTGGGGATGTTGTG  
GAGCAGAGACGGAGAGAAAATGGGTGCATTGAGACAAGTTAGGGGGAAA  
AAATGCAAGGACTTGGAAATGAACTTGGGGCGCGCAGGAAGGCATGACG  
GGTTGCTCTGTAGGTCTTATCTGTAAATTACGGCGATCAGTAAAAGATCT  
GGAGGAGGAAGGTGGACACACTCTCTAACAAAAAAAACCCTTTTTGAAT  
TTTATACCAATATTTTTAAAGTAAACCAGATCTTTTCAGACATGCCTTTG  
AGCTGATATTTGTTAACTAGTTAGAATTAGAAACTTTCCCTATTTTTACT  
CAGTTACAATATACGCCACAGCTGAGGTGAGAGGAAAAGAAAAGGTTGCTT  
TCTTAGGAACAAAGAGTGGTACCTTCAGTATCGTGGGCAAAGCTTTTCCA  
AGTCCAACAGCAGTCAAAACAGCGCTTTTTATAAATAACACTCAGCTAAA  
AGTTTCTGGGTTTGTGATTGTTCCAACGGTTAAGCTCGGATGAGGGTCCC  
TGGAGTCGTAGCTCCCGGGAAAAGCTCGACTGGCTTTCCACCTGGACTTCA  
TCCGTCCAGGCAGCCAGAGGGGCTTCAGGCCCGCCCGCTCTCTGCCA  
ACTACAGCCTCGCAGCTCGCCTCAGCCTTCAGGCCCGCCCTTCGGTCA  
AGCGGCGTGTCTCACTGCACGGCGCCTGGGCCCGCGCGCCGGGACCTC  
GGTTTCAGCCGTCTGTCTGCTGCCCCGAGGCCCTAGGCCCGCCCTGGG  
CCCCGCGCGCCAGGACTTCGGTTTTCGACCGTCTGTCCCGCCCCGAGGCT  
CCTAGGCCCGCCCTCTGTCCCCGGCGTGTCTCGCGGCTCCGCCCT  
AGGACCCGCGCGCCGGGACTTTGGCAAGTTTCAGCCGTCCGGCCCCGCC  
CCTCGGTCCCACGGCTCTCGCGGCCCTCCCTAAGTCCCACACGCCGGG  
ACTTTGGCAAGTTTCAGCCTCCAGCCCCACCCCTAGGTCCCGCCACTCG  
GCCAGCGGCTGGCTCTCGCGGCCCGCCCTGTGCCCTGCGAGTCCCTAT  
TTTGGGAGCATTGCGGGegecgtgecegecctccccgegcgccccgcc  
ccTCTGGCGGCCCGCCGTCCAGACGCGGGAAGAGCTTGGCCGGTTTCGA exon 1  
GTCGCTGCGCTGCAGCTTCCCTGTGGTTTTCCCAGGCTTTCCTTGCTTCCC  
GCTCTGCGAGGAGCCTTTCATCCGAAGGCGGGACGATGCCGGATAATCGG  
CAGCCGAGGAACCGGCAGCCGAGGATCCGCTCCGGGAACGAGCCTCGTTC  
CGCGCCCGCCATGGAACCGGATGGTCGCGGTGCCTGGGCCACAGTCGCG  
CCGAGCTCGACCCGCTGGGAAGCTGCTGCGTGTGCTGGTAAAGA  
CGGAGTCTCTGGGGTGGCTGCGAGGGCACGGTTCGCACAGTTTCTGGG BARD1\_e01''  
GGCGGCAGAATCTTTTCAAATCTTCCGTTTCTTCCGTTCCCGTTCCCGCGCT  
GCAGTCGGGTCCGCGTGCGGTTAGCACCTGCCGGGGATATAGTATTAAC  
AACTTCTGCTTCTCATTCACTTTATTTTTGGCGACTTACCAGCCTCCCC  
TTGCCCTGAATCCAACGAAAcggtagtttttgaacttcagcgggctgaa  
gaaccgtctggagggtgtggctaaaaaaatgttcatcccggtcgcgccctcc  
agagtttgaatcgggctgggggtggggctgaggcttctgcattttttacCC  
GGCCCTGGATTACCCCGCTGCTTTCCGGGAGCTGTGGCGAATTGGGCTGG

CGGGCCGCCCCGGAGACCCTCTAAATTAGAAGCAGCTGCCACTCTAAGTT  
AAACTGGCCTTTTTGACATTTTCTCCGTGCCAGCTTTTTTCGAGTGAGATG  
GGATGGAGCATCGGATATCTACCATAGTTGTAGATTGAAGATGGCACGGA  
ATTTCTCATTTTCTTAGTTTGTCTAAAAGACTGTATGTCTGGTGTCCCCG  
CTCTTAGTGTAGTGTGTTTATTGTTTTCTTCCATGCTGTACATTATGGGA  
GTCCTCTCAGGTTTTTCATTCCGTCCAAGACATTTTTCATGAGTGTTACT  
TCTTGTCTTTTTTTCGTGTAGCTCTTTCTAGTATACAAACCAAGAAGTTT  
GTAAAACCCAAGAAAGTTTTGTCTCATTTTTCATTTCTTCTGAAAAGCATT  
TTTTATTGAGCACTTGTGTGTGTACAGCTAAGTATTTCTGTATGAAGATC  
ACTGGCAGTTTTTTTTGTTATTTGTAGCTGTCAAAGTTTATATCCTTTTTT  
GGACTTTTTTCCCCTTTGATTTCTAACTTGCAGAACTTAAGTTACCTAGT  
TGCATAAAGTATAAGTAACACAACtTTTTcttttctttcctTTTTtgaga  
cggagtctcgctctgtcgcccaggctggagtgcagtggcacgatcttgtc  
tcaactgcaagctccgcctcccgggttcacgccattctcctgcttcagcct  
cccaagtagctgggactgcagggccccgccatcatgcccggtcaatTTTT  
tgtatTTTTtagtacagatggggTTTTcaccgtgttagccaggatggtctcc  
gtctcctgacctcgtgatccgcccgcctctgcctcccaaagtgtgggat  
tacagggctgagccacggtgcccggccAAACTTTTTCTTTAAAAATGAAA  
AGGACTTAACTGTCAGAGTTTTGCACTTATATTTCTTTGACGAAAACCT  
TTAATATCTGTGACAAAATGACATTGCACTTCTTAGAAAAGTGACACTCA  
GATAAGTGAGTACATGAAGACATTTGAGTTGTGTGTTTGTTCCTGTAG  
CACATGGGTATCTGAGAATAGGAAATTTAAAAGTGGCACTGCTAGTTGC  
AATAACAGAAGCATTATAGTTTACACCTTGTAGTCCAACGAAAGTTAGA  
CATTCCCTTGGCATTACCTATgtggaagcatcgggcttcaacttagactg  
tggtcagaatgcctgagttcaggttctagcttgcactattgagtaggc  
caagttattcatctctcattttccggatagagtaataactaatgattagc  
ttatTTTTcttgtgaggattcattaataatcataaatttattgagcaccia  
taaagtgccagaccctattctgggtattggggatttgttagtgaacaaag  
cagacaataaattccatctcttagggagcttttatggaagaaacaaAATG  
AAATTTTACATGTATGTAAAGTATTGAGTTTGGTGGTTGTGATAGAATAA  
ATGATAAATAATGTGTGTCTTAATCTAAAAGAATGTGGTGTTCCTTGCT  
ACATGATTTGGGAGAGACAAAATAGATAATATATATGAATATATGTTGTC  
CTGAAAATAACAAAGCCGGTTTCACTTTTTATCCCCTACCAAATATTTT  
TCCAGTTTCTAACTGAAGTGAGTAGACAGTAAGAGGCAACGGAGTGAAA  
CAGACATCAGTAACCAGGCCAGACTTTTAGCATGGCTCACCCATTTGAC  
TACAGAATGCTATTGAATGCTATTGATTTTTTTTTTTTTTAATCCGAACCT  
CTATAGATGAACTGAATCTTAACTCTTAGACTGCATGTTTTTCAATGTaggg  
gtctgcaaattTTTTcggtaaagggccaggtaattaatatttttaggcctt  
tctgcccgcaaatagtTTTTgttcttattttatttttacatctcttaaaaa  
tgtaaaaaccattctttccttaagggtgtacagaaacagactgctggct  
tggtttggcccacaggaatagttGCTAAACTGTCGATAAAGTCTTGATA  
AACTTAATGTCTCAAGTTTAAAAATCCTTTTTTGGTATACAATTTTATATC  
ACATGGGGTGCCTTTTTTTTTTTTTTTTcctaggcaagtttcaactctg  
tcacccaagctggagtgcagtgccatgatttcagctcaactgcaacctcct  
tccccgggttcaagcaattctcttgcctcagcctcctgagtagctggaa  
ctacaggtgcatgccaccatgcccggtaatTTTTgtatTTTTactagag  
acgggggtttcatcatgttggccaggctggtctccaactcctgacctcaag  
tgatccgcccacttcagcctcccaaagtgtgggattacagggctgagcc  
accatgcctggtcTTTACATGGGCTTTAATGTTTAGAAATGATTTTGCTT  
TCCTCTGTAGGTGTCTCTGCAACTTTGGCACTATCTATAGTAAAAAAGC  
ATGGCCAGCTGCACCTTACTCAAGGAGGAAAAGCATTGTTCTACCTCTG  
CCTTTGCCCTGGTAGCCTCCTGACATTGCCGGCAAGGAGCAACTCAGAAT  
GGTCTGCTTCTTCCATTTGCTACCCTCCATTCAAAGCAGTGTATATTAT  
TTGAAATTGTGTGAGTATGTCCTTTTACAGAGTTTACAGAGTTCTACCCAG  
TGGGCTAGTGATTACCCCGATTACCCTCACATTACAGCTTGCAGCTGACAT  
CTGCCTTGTGTTGCACATGGATCTGTTTTGCAGCAAGCATTACTTGCTGG  
TGAGGGTGGATTGGTACATAACCGGGCATCCTTTCTTGACCTTTAACATG  
AATCTGGCTTCAAGGTGAACCCGATGAAAGTGTCAAGAGGCCAGATGTG  
ACATTTATATTAGGACCAAGCCTCACAACCAGAAAGAAGCTATTTAAGGA  
TTTTGAAAAATGAGACAGGAAGACCATATTATTTGAGAGGCTGGCAGAAA  
GCACAGTAATAATGTGTTCTAAAGGAAGCAGGAAATGGTAATAAGGAGCT  
GCAGTGTAGAAGCCCCAGGTGTCATATAACACTGTTTTGTGAATTAATAG  
GTACCTCTTGGCATATTTTTGAGGGTGTAGAGTGGGATTAGACATCTATGA  
CAATTGTAACGTGGGCCTTTTTAATCAACTTTTTTATGAAAAGTTAGAAAG

TAATCTTTTAAACCTTTATGATAGGTATTTTTTTTTTCTGAGTTCTTGTT  
TAGGAGATGATCAAGCTTAATTTTGTATTCTCTCATACTTTGAGGcagca  
tagttagatgtaaatgtgtggaatctggagttagattccctgggttca  
aatcctggctccattatthtaggtatthttatctthttatgcttccttht  
ttcatctgcacaaaatgagtggatattcataAGATGCCTTGAGCTGTGTC  
TGTTATGTACTAAATACTATATGAATATTTGTGAAATAAAGGATAGGTTTC  
TCTGACTCCGGGTTACAGCTTTTGCCTTTCTTCATGAGTTTTGAATGTTCA  
GAGGCATTCTCACAGAGCAGTGATCCCCAAATGGAATGATTTCTCCCTGG  
CACTGGTTATTCATTAGAATAACGAGAAATCACTGAGACACTGTGTAAGG  
GGTGATAAGGTGATGCATTTTCTACTTCTGCCTTTAAGGAGTGTATGCTT  
AATTATAAGGGATAAAAATAAATACAAGTTCAGGGTAAATTGTCGTGCAGG  
TCGACATAGTGCTGAGAAGAGTACTTGGGTAGGGCCAGTGAAGGAAGCT  
TCATGGGCTTTTTAAATTGAAATATGAATAGAtthttctthttctgagacg  
gagtctccctctgtcaccagggctggagtgcggtggtgtgatctcggtc  
actgcaacctccgcctgccaggttcaagtattctcctgcctcagcctcc  
tgagttagctgggattacaggtgagcgcaccaaacccggctaathttgt  
atthtttagtagacacggggttccacatggtgctcaggctggtctcgaac  
tcctgacctgtgatccgcacttcttggcctcctaaagtgctaggattac  
aggcgtgagccaccacaccaggccGAGATGCGAATAGATTTTTAAAATGG  
AGCCAGGTTGCAGGGAGCTGGGGTGATGGGTGTTATTTGCAAATAACTAG  
CTATAAAGAATTGTAGGGTAAAGGGGGACTGGGTGAGGTGAACAGAGAGT  
TAAGACAGGGTCAAATCAGTGATAGTAGCCTAACACAGAATACTCAGTT  
GGTTTATATAGTTAACTTCTTAAAGAgagcaatthgtatagctthcctgg  
actctggthcctcatctataaaatgaggaatggactcgttgatttgta  
aagthcctccagthtgcagatthcatagttATTTGTGTCCACTGGAtga  
agthtaacatacatacagaaaaggcacaatcattgggtgttcagcttgTA  
TCGTATCTTCCAAGTTAGAATTTATTTGTGAGATTTATTTATTTATGGAA  
TATTTTGAGTGATGTCTGTCTCCTTCAGTTATATTTAGTAAAACTAGG  
TTCACGTTTGTAGCCACAATGCCAGACACATAGTTTCTTAGTGTATGTTA  
AATGTAGTATGAAAGAACTTAGGTTAAGGTAGGATCACATTTGAAGGGC  
CTTTGCAAGTGGTAATACCAGAAGATCTAGTTAATTTACATGAATTGCTA  
AGAATCCCCTATAGGTTCCATGTCATTATCCATATACTTTACTTGTAAA  
CACTTTATTCTTCTAAAGATAAACACAAGAAAAATTGTTTAAATTGGCTTG  
GTGAGCCTGCACATTTAGATGTTCAACATGTTGGTCCACACGTTAAAATT  
ACCTTGAGGATTCTTTAAATGTAAGAGCACTTTGGGAGCTGTCTTGCCT  
AATATTAATAGCAGTTGATATTTTCATGGAGATACAGGGGAGCCATTCTA  
TTAAGAAATAGATCTGCCTTGGTATTATCATCTCAGATGGATTTACCTTC  
CTTTTTTCTTTTTCGAAGAAAATTTTGTATCAGTAAGAACTTTAAAAAAA  
ATTGTTCTCACTACTTAATTCTTCCCTAAGTTATCTCTGACAGCACTGA  
TCTgaaggggtgggttgccccctccacacctgtgggtgtthctcgtaaggt  
ggaacgagagacttggaaaagaaaagacacagatacaaagtatagagaa  
agaaataaggggaccaggggaaccagcgttcagcatatggaggatcccgc  
cagcctctgagthccttagtatttattgatcattcatgggtgtthctcc  
gagagggggtggtcagggtcacaagacaatagtggggagaggggtcagc  
agacaaacacgtgaacaaaggctcttgcaacatagacaaggtaaaggatt  
aagtactgtgctthtagatatgcatacacaagaacatctcaatgcttht  
aaagcagtatthgctgcccgcacgtcccacctccagccctaaggcgttht  
tccctatctcagtagatggaacctacaatcgggtthtatactgagacatt  
ccattgcccaggggacgggcaggagacagatgccttctctgtctcaact  
gcaagaggcttgcttctcttataactaatctcctcagcacagaccctt  
tacgggtgtcgggtcggggacgggtcaggtctthcccttccacaaggcc  
atathctcagactatcacatggggagaaacctggacaataacctggctthc  
ctaggcaggggtccttccgcagtgthtgtgtccctgggtacttgagatta  
gggagtggtgatgactcttaaggagcaagctgccttcaagcatctgttha  
acaaagcacatcttgacacaaccttaatccatthaacctgagthtgaca  
cagcacatgthtcagagagcacgggttgggggtagggtcatagattaac  
agaatctcaaggcagaagaathttcttagtacagaataaaatggagtct  
cctatgtctacttcttctatacagacacagtaacaatctgatctctctt  
gctthtccccacaCTGATCTTTCTAAATCAACTACATGTAAAGTTACAGA  
AGTATGACTGTAGATGGGGAAAAAGTAGAGTAGCTGAATTTTCAAGGTAC  
AGAAATCCTGTTACCATGCAATGTCTTCTTATTTGTTTGGATTTTTT  
CTATCTAATATATATGTATATCAAACAGAAAATAGGGTAAGGATAAAAATG  
GAATTGTTAATACAAATGCATTTTTGTATATAGGCTTCCATTTGGTTCAT  
TCACTAAGAACTTATTGAATCCTGCAGTTAATCTAGCACCATGCTAGGT

AGGTAATGGTGGGTTGGGGAGCTCAGAAAAAATGAAAGTTAAGATCTCTT  
GTCTTAGGGCTGGAGTCTAATTTCAAGACAAGAGAAATAGAAAAATCAGGA  
AGTTAAAATAcagatgctcctgaacttgagatggggttatgtctggatca  
acccatagtaagtttaaaatattgtatgtcaaaaaatatatttaataataca  
taccctaccaaacatcatagcatagcccagcctaccttaaacatgccag  
aacactaacattagcccagttgggttaaatcatctaacacaaagcctatt  
ttataataaagtgtttaatagctcatgtaattttattgaataccatactaa  
aagtgaaaaacagaatgacttcctgctgtggcccagcattgtactgcata  
ttgctagcctgggaaaagatcaaaaattcaaagtgtgatttctattgaatg  
tgtattacatttgcaggataataaagctaaaaaattgtgagtcgaaccat  
tgtgagtcagggatcatctgtACAAAATATTTAGTTTTCAAgcctgggca  
acatggcaaaaacccacctctacaaaaaattagccaggtatgggtgtg  
cacctgtagctctcagctatgtgggaggctgagatgggaggatttcttcag  
ctcaggagttcaaagctcagtgagctgtgatcatgccactgtactccagc  
ctgggagcagagcaagatcttgttttaaaaaaacaaaaCAACCCCCC  
CCCCCGCCAAATATTTGGTTTTCAACATTGAATCCCAGAACCCCAACTAG  
ATGCTCTCTTCTTTGTAACCTTTAGAGCATTTTGTACATCTTTAAGTCAT  
ATTAATTTGGTTTATGTAATTAATTGGCCAGATTAAGACCCCTTAGAAA  
AGAGTGGAAACACAGTCAACTTTGTTCTTTAGATGTTACATGGCATGAATT  
TTGCAGAAGTGATGGCTGGAGGCTGAAATCCAAGAGATGGACATAGGCTA  
ATAATAGTTGTAAGAGACACTGGCCTGACCACAGCAGAGTTTTTGTGAG  
GAGCAATGAGAGAAAAGGTTGCATGGCTTAGGTGTTACAGATTGTGAAGA  
ACTTTTTAATAGTAAATTTTTTTTTAATGGTAAACAGTGTGTGAAAAGAA  
TTAAAATAACACAGTATATTGGCCATTTCAGTATTTGTTAAATGAACGACAG  
ATAAGTGTGAATCTTCTTCAGTAACTTATAATTATCAGTTTCTTGTGTAT  
CCTTCAAGAGGTTCTATGTTTCATATAAGCATTGTACTGCCTCAGATAAGC  
AGATACTAAACACCATGTAGTTGTTGcatgattcatttaaccatttccctt  
attggaaacattttaggttgtttgtggctttttgctgtaacaagcagtgct  
ggagtgaTACTGATGTCATGTGCCTTTACATTTAAAATGTttttaaataa  
agttatacatgaacgtagttgacagagtcaataggacagactattaatga  
aaacatttcttgccttcattccttcattcaccctgagttctatgcatcagaa  
acatcttttgccttttttttaggttttacaagcatgtacctctacatttcc  
aaatagtttatattgctatttattttttttccattttagatgttatta  
acttcctaactattctcaaagatgaATTTTCTTACTACTGTTAACTTTGA  
CAGTGAAGTTAGTggatgtagaattcaaagtacaaaataattgtcaaga  
attattttgaaggcctcgttccacagttctgtagcatctctattaccct  
tgagaagtcttatgctatcctgattccttttttaaaaaagtatgacat  
ttaattttatttatttcttaaactctctggaagggttttagaatcttgtctag  
atatctttgatgtttgaaagtttcaTTTTtgcaagtatctagtgttgctg  
aaggacaaattcctggcagtggaatagctgagttaaagttggatgcattt  
atattcttgataggtatctcctagttgTAATAATTTTTTAAAAAGtttt  
tctaagatacatgttctctgtgtgtgctccaggctggagcgcagtggtct  
attcacaggcacgatcatggcacactatagcctgaactcttgggctcaa  
gctttcctcctgcctcagcctcctgagtagctgggattgcaggcatgtgc  
cactgAATTTGGCACTCCCTTCTCTCTCAGCTTGGCTCACACACTTCCTT  
CTTGTTCCCTCCCCAATACACACAAGTGCACATACTTCTCATTACATT  
TCCATTATCTTTCTTATCCGTTAACAGCAACACAAATATATATTCTAAC  
TACTAATTAGAATAATTAGTACAACACTGATCAATTATTCCACATGTTAA  
ATCATTACTAATATGTGATAGCACCTTATTGCTAGAGTGAAGGTTAAGAA  
CTATAGCTAAAGAGTTCAGTCATCTTAGGAAGGAAatttaaagttgagaa  
acagaatcaaggcgttgagtcaagtatgccagagaaagccggaaggcta  
cggactgcatcctgggggtatgcctacatggagaggtaggaaaagcagct  
aaggaaatgctgaaataggcagatcaatgtgtataaaaatattaaaatgc  
ggtggaaggaaagggttccaggaaagaagatgaggtcagtgctgtttccca  
gagtggtcagagagaaggggacaaaaatgctttggagaacagtttcagc  
agagtggagggagttaaagctaggaagggtgaggagatgggagtagctgg  
atggagcactcatttaagaacttttctgttcaagaaaggaagagatg  
gagcagaaggtagaattgggaggtatgatcaaaactgtgtttttctgtgt  
caaaggagagattacctgttcatgtgtagatgcaaatgagagaagaaagg  
caagtattatgaATATCTAGTGCTTTGGGAGGCAGAAAAGATATGGGAAC  
TATAGGTAGAGTAGCACATTTTAGGAAGAGTGAAGGAGATCGAATT  
TTCCTCTTAGACTCTAGGAAGGGTAAGATGACTGGTGAAGAGATAAAAAAT  
GTATTTAGGTGTTAAAAAATTTACACCATTAAGTTCCAGTAAGTTAATG  
AGATGAGGAAGCATAGAGATTGTTTTGAATAGCCATCTATTCAATTTGTTT



CTCTTATTTCTTGTTTCAGGAGAAAATCAGTTGAGAGATTAAGTGTCTTAGT  
TTAATTGCCTATGAGACAGGGAAAATATAGTCTCCTTTGAATTAATCTTT  
TAATTATTTCCAGTTATGAGTATGTTACTGTCTGACATGAACAAATACAT  
TCGGAAATTTGAGCATATATGAAAATAACCTTGTGTATTACTTCAAGGGC  
TAAGGTTGTCTGGGAGGCAGCTATGTTTTGGGTCCCAATTTTGTTCCTGG  
AAAAACAGACTCTGTTATACGAGGGATATCCAGCAGGAGGATGGGGGGTAG  
GAGATGGAACCTGTTgcctaccagatacgtctggttgatgatgaaagaa  
aaggcatttttaaagttggtgtgttcagagctgacctcttgatcatcctcc  
tcttcagccttttctgcctgggtaatcttcatcacagtaaatggtacca  
gttactgctagggtgcttatcccacatcgctaagttctgtcagttctgcc  
tcaaaatgtgtcctgaatcttgaatttttccacctttttctgaatttc  
tacagtttatagtttgttccaagccatcattgtattatctctgctcatac  
tattgtgatagggtcatagctgggtcttccctttttggcatcatcaccct  
tcctcattttctacattcttgacagtgatctttgaaaaatcacgataata  
tccatatcattaccctgcttaaactctttagtggttccctattgcagtta  
aaataaaatccaagctctgccctctgggtctgcaaaaccctgatgggacc  
tagaacctgtcttccctcttgagcgtcatttacctctggctcacactgttc  
cagcacttctccttttagctcattcaatacaccaaattcactcccggccc  
aggactttggcacttgctatttctccacgtgaaatgtacttatgccaga  
tttctgtgaggcttactttttaccagttatatacagctgaaatgtcact  
gcctccaaaacgcctcccagtgatctgcttacgaaatgatgccactccc  
tgtccccaCTCTGTAGCAAGCAGATGTATTTTGTTCAGCTGACAGATGA  
TGGGTTTGTCTCACTGTATACAATAGGTCAGTCACAAAGCTGCTAGAGCAT  
AATGAACTCCATGACATTTTATGCAAAGTTGGTTTTGTGTGTGTGGTGGG  
TGGGGGATCCATACGTTTAAATCAGATTCTAAAGGACTCTGTGACTTAAAA  
CAACCAATCAAAGGTTTGGAGACACGAGAACATCTTAAAAGAGAAAATGAT  
TATGTGTATATGACATGAACGTAGGAAAAGAATTCATTCAGTGCAGTTTTG  
ATTTGTTTTGATTATATGATGCCAAAATATGGTAGCTGTTTTTATTCA  
TGCAGATTTTGGATTAAAAGTCTCAGCAATGAGGTTTTAAAATGATTTG  
ACATAGCTCAGTTCAACTGATAAAAGTAATTCATCTACTCTCTAAGATAC  
AATTTAAGACATGTGGcaggggtgctcaaacattttgagcattcttcaga  
attgagaaccataaagagcttttgtgtgttcatgcatttaccgtacaaaa  
ctgagacttttataaaaaaatttaatttaaaaaataataaaccattaataca  
aacacaaataacactttgtgaaggaaaaataacaatttttaacaaatcaaag  
aaaaaaatagagtggcactgttgtaacatttttgcaaatctctgtcttgct  
gaatggaaaacagctacattctcaacttatataattcagctcattgtgata  
cttttttgattgaagaaaatctggctttatacataattgtagttggaaga  
agtattgaagtattttcagtagcttttttagataattgtggctattcttc  
tttaatactacacccaaacttgacaagtgttttttatttttatttttt  
gtgaagacaagagtctcactctgtcaccaggtggagtgagtgagtgagtgag  
atcatggctcactacagcctcaactcttggttgggtgatcatccaatc  
tcactttctgagtagctgagactacaggtgacccccaccgcctggcta  
atttttgtagttttttgtagagacaaggttttgccatgttgcccatgatg  
gtcttgaactcctgggctcaagcattctctgtctcgccctcccaaagt  
gctgagattacaggaatgaatcaccatgctggccaacaagtgtgtttt  
ctttaggttcatcacagtggtgaatctgaaactatatcaatataattttta  
tactctgttacatgaaatctcattgggtttatctagtactttgaatttatc  
tggtactcagcatgattttatgacatcacacacgggtcatttgagaaata  
ctcactgagctatacaggtccaccgaaaaatgacattttttTCAGAATTC  
CAAATTAATGTATATAAAAATAATTTGGGAATAGTTTATAAAAATGTTATAG  
AAATATAAAAATACTAGTCTGATCTGAGTACTAGTGCAGTGCtggacaagt  
aacttaaaataactggatctcattttcttcatccaaaaatgaggtggtagt  
tcttgatgaGTTGATTTTCAAGATTGTATTTTACTGATAATTAAGTATTGCA  
CAAATGATTTAAATTGCATGAGTAAATCAGTTTTACATATTTTTTTGTGTT  
GGGGTTCCAAGTTAGAGTTCTTAACTACTAGCAAACAAATGTACAGAAGA  
TCCTTTGCTAAAGAAAGTTGACATTTATTGACCCAGTGACATTTTTtga  
attagatggtcccaaaagtctctccagctctggtatGGGTTACAGATTC  
ATTTTACAATTTTTTTTTGAGTTACATTTCTGTGAGAAATCATGCTAGAAGC  
CAAGGATACAAGAATTAGAAATGGCATAGGTTTTGTTTTGAGGATAGTTCA  
TATTGAGTAAGAATCCTCTCTGCCTACAGAGGATTGGGTCTGTGACAAG  
GAATGTCCTGTGGTGTCTGGGGAAGATGTGGCTTTTCAACTGTTACATTA  
CTTACTCAGTCTACTGGAACCCATCTGGTGGGCAATGAAGGAGGAGA  
TTTATAGAATTTCTTATTCTGGAATTCACAGATGGGCTTGTGGGGGGATC  
GTGAATCCCTCTTTTTTACATGAGTATGTATAGATTTTCATCAGATTTGCA



AAAGGTCTATAAACCCCAAATAGAAAACTCTTCTAACTCTGAAACTT  
TAGTCCTTAGATAACCCAGGTAATTGAGTCTACAGGTTTTAAAAATTGTCT  
GAAAAAGTCAAAGATCTTTTCCCAAAGCTACTTTAAAGCCTTGAGATAC  
TAGTCCCAAACAAAACAGAAGGTCTTTCCAGTGTCTGCAGTAGTTTTG  
GGTATTTTCATGCAATGTTAAGATAGAAAAAGTTAGGATGCACGACTACT  
ATGCATTAGGCATTCTATCTTTCTGTTACATCTCTGTAACCTTTAGAAGC  
TACAGATTTATTTGTAGGGAAAATTATGCAGACTAATAATCAGGCTAAGT  
AAAGTCTCTTCATAGCAAATTACATGAGCAACCTTAGATTTGATGTATGT  
ATTTTACTCTTTAAACAGTATTCAACAAGGATATTACAATTGACCATTG  
TATGTTAGAATAACCTCTGCTCCATTTATTTCTGTTCAAACCTGTTTAGTT  
TTTGGAAATTAATTCTGCTGAATGGGTTGCTtttttttttttttttaatt  
attttaaaGTAATTGTGTAAGTGAAGTGCATTGGAAGTGGATGTCCAGTGT  
GTTACACCCCGGCTGGATACAAGACTTGAAGATAAATAGACAACTGGAC  
AGCATGATTCAACTTTGTAGT  
TGTCAGGTAAGAAGTATCCCTATCTCTCTTAGTTAAATTCATCAGTTA  
AAAAGTATGAAATTCATATTCATAAAGTATATAAAAACATCTATCTGGAGT  
TCTGGAATACGTATTTTCAAGTTTTAAAATCTGTAGGTttttttttttttt  
ttttaaatagccattgagtcctctctatggtgtccaagccggacttgaact  
cctgcactcaagggattccccccacctcagcctccctgggtacatgcatgt  
gacacacccggTGGTTTTTGGAAAGATCATTTTTGagaaatgacgggaacc  
atagagataaattaaagtctaaccccccttattttatagttgagaaatcaag  
gtccagagaggtgaaataaccttgccacagccgcatgtgtagttagtagt  
tagaagctggagaaataaacgcccatttctgactgtaaataccaggaacttt  
tttgcctgctTTACATTAAGCTGCTTTTTTACATTTATGATAACTTCTGCAGA  
ATATATATGGAATAGTGAATTTGGCCTTAATAGCACTTAACTCACTTAAA  
TACACTTTCCCAAGATAGAATACGACATTTTTCCATGGATCACTTTTCTA  
GACTGAATTAATTAGATGAGCACATTTTTGAAAAGAGCAGAAAATCTAATATT  
CATTTTTCTTTTCTATTTAAGTGGGGGTTAACGTTTTTTAAAATTGTCCTTA  
GACTCTGTGTATTAAGTGTGTATCTTTCCATTGTGCTTTCTGCTGAGAAC  
TAATTAAGTGTGAAAGAAGTAAAATGTTTTGTATCTTCATAAATTGGAT  
ATTAGAGTTGTCTTTTTTATTGACCAGATCATGCTATTTTAGTGTGTGTTT  
GTAGAAGAAGCTGTTCTTACTGGCAGGATGCCATGGATGATTGATAATG  
CTCATATAAAATTTGTTAGATTTCTATTTTTTAAATCTTTTGTCTTAGAAT  
CCTGCCATGATGTCTTATTGTGAGCTAAAGATGAAGTTGATTATACAAAA  
TAAATAAATGTGGCAAAAACCTTTGAGTCTTACCACAGGTCCATATTTTTTA  
AGAATTAGAAGTAAATCACTTTTATACCTATTAATAAATTTTCTTTCAGCTA  
GTTATCTGCCTCATTGTATTCAACTCCATTCTTTTATGATAAAAATGTGCT  
GTAGTGCAGAAGTTTTTCTTACTTTTCCAGATGTAAGTATAACACACACATTT  
TAAAAGTTGCCGTTTTTTAAAATGATATTGTAGTTGTAAACCTTTTTTA  
AGAACACACTGAAGAAAATTTCTGTCATTAGTTCATCTGAACTCTTCTTA  
TTTTAAAGACAGTACTGACAATGTTTTATTTTCTAGTTAAAAGAGATTGGTG  
TGTGATCTACCTTTCTCTCCCACATAGATACCGAGGGTCAGTGCAGGGG  
TTCTTAATCAAGGGCCCATGCACCTTTGGCAGTGTTCAGAGTTGAAGTGG  
GTAAGGGATCAGTGAGCTTCTTGTAGTTAATTGTGCAGTATGAAAAGTGT  
CATGTTTGTGTGAAAGTGAAGTCTTTGTTAGATTCTTAGGAGTGTGTGGTCT  
GTTAGGATTATTGGCTTTGCACTGAAATTTGGAGTGTACTTTGGGATTT  
GTGGCTATGATGATATTTTGTATTTGGTCTTACCAGTTGCTGTATAGTA  
Atgtattcatttgctagaactgctgtaacaaagtatcaaaactgagtgg  
cttaaacacagatatttattgtctcacaattccagacactggaagtctg  
agatgaaagtgtatgcaaggttggttctttggtgaggtctgtgagacaga  
acctgttttaggccagtccttgtctttagatggccatcattatgta  
acatggtttctccttgtttgtgtcaaatctccccctttttaaggacag  
gagtcattatgcttgggagtcaccctactccagtatcgcttcatttta  
gctagttacatctgcaatgacctatttccaagtaaaagtcacattctaag  
ttactgggggggttaggacctcaacatgtgaattttgggtgggggaggaaca  
caatttaTAACAATATAACATTTTTAATGATGATAAATGGAGAGCAGGGT  
AACCTTGTGATTTACCCTTGTGAGTTATGGCATAACCATAGGGGTGCA  
AAAAAGATAAGATAGACTCCTTTCCAGAAAATTTATTCTAGCTAGTGAT  
GTTTGAATCATTTATATTTTGGAGACTATGGAATATGAAATGCTTTCTTC  
ATATTTTCATCATTAAGATATTTAGGAAAATTTAGTTTAGAACAAGTTTC  
TGAGGCCTTTAAGAATGCGGTCTTTCTCATCTAAGTAGAGTTGGAGATTG  
GAGAGATAATTCTACTGATTAATTTCCCAAAGGCCATTTTATGTTTGT  
TCCTTATTATAATTAGGAATAATTTTATGTCCTTACCAGACTTAAGCA  
CTGCGCCCTCAACGTTACTTATATTAACCTGAGTTGAAGTTCCTGTTTA

exon 3  
BARD1\_e03

GATAACacataatcagaaatntaggaacacgaaggatcatctttaatcccg  
ttattctgtaggttaaggaaactgaggaccagggtacacagggcagttgt  
gttgtaaatttcttACTGTTTTTCTATTTTACACAACCTTTTTGGTTCGAA  
GTGTAGGTATTCAATTATGTTTGTGAATTGAGTTGGATAAAAAATTGGCAG  
TGCTAATTTATATGCTAGAGACTAAA<sup>C</sup>ttaattaaattatthttatt  
tattttgagacagacagtgtcttgctctggtgcccaggatggagtgcatt  
ggggccatcatggctcactgaagccttgaactcctgggttcaagagatcc  
tcccacttcagcctccaagtagctacgactacaggcactcaccaccaca  
taccctgccaattaatTTTTTTTTTTTTTTTtagaagagataggggataggg  
tcttgctgtggtgcccagggtggtcctgaactcctggcttaaattgattct  
cccacctcgacctcccaaagtgtggtggtattacaggcatgagctaattgt  
gcctgacctaatataaataatTTTTAAATA<sup>C</sup>ATTCTTAGAATTTGGTTTA  
AATAATTTCAATTCATAATGATAACATCTATGCATTCATAG<sup>A</sup>CTTCTTA  
AAAAATTATAATGGTAGTATCTTTCTTTGCTACTTTGATAGGAAATGACA  
ATAAATTTAGAGTATAAACATACTGAATTATAACCTTCTGTCCAGATCTC  
TAAATTCATGGTGTAGAGCTTTTTCTACTTTAATATAAGTTGTATAGAC  
CCCCA<sup>A</sup>CTTTTCATCCAAA<sup>T</sup>TCTTCCCAAAACAAACTAGCCTTGAAGGG  
CATTTGAGATTTTTTCTGGAACATTTCCCTTTGTTT<sup>C</sup>TTATAGTTTGT  
CTATTCAGTGTATTTTACGCAGTACCTTTGTGGTAATTGATTATCTAGTA  
AGTACTTCTAGA<sup>A</sup>CTAAAAGGTTAGAAGGTA<sup>A</sup>ACTATATACCAGGAACTG  
ATAGTTGGGGACAAATGACAGTTGGTCTTCTTTATAATAGTAAGGAGATT  
GGAAAATGATctcattaggataagggattagattaagtgattcctaagc  
tgtctctccaaaattgtatgattctgtTAAATGG<sup>T</sup>CATGTGTAGAAGATG  
ATGAATTAAGTGAATGGTGAACATCTCTCACATTTTCTCTTTTAAAAAC  
CCTGTAGTTACAAATTTATCTTTCAAATGAACCTTGTACTTGCATTTAC  
TATAATATATATAAATTACTGTAATTAAGGTGGGCAATTAGGAAGA<sup>A</sup>CTTG  
TCAAATCATGGACATAGTGTATGGTATACTGGAGATAAAGAAGCCTAATT  
TGTAGTAATACTTTCTAAAATGAGCTTCTAAATACTTGAACAGATTTTTC  
TTGGTTCAGTGTACTTTAAAGAGGAGATTGTCAAATTTTGTGACAACCA  
TTTATGGATAATTTTACCTTATCCTTTATAACATGATCTTCTTTTACTA  
ATGGAGTTAAATTTAAAGTTTTTATTTTCTCTTCAACCTATCATATTA  
AGTCAGACCTTGCAGGTGCTGGTCAGGTTCTGTGAAACATGTCGGTGTG  
GTGACATT<sup>A</sup>AAAAAAAAAATACTTTGATTATGCTTTTATAGTATTACAATT  
T<sup>C</sup>TTTTTCTATTTTCTGCTT<sup>T</sup>AGAGAGAGATGCTCGTCTTTCTGTAACGA  
TTACATAGTGTTCATATATGCTATGACT<sup>T</sup>TTTTTATAATAGAGGAAGATG  
AATGTTTGAATAGCTGTGTTGCTGTTGTTTTTCTTAAATAGTACTAAATG  
CTTCCTAGCTTACAAAATAATCATTCTTCAGTGAAGGCGTTAATGTTGCA  
CAGATGGTAGCAAAGGACTTTCCCTTTGATTTTTAATAAGGGACTGGTTCG  
TCAAAGAGATTTCTCAACTTCTGTTGTGAAACCTATAATAGAGAATAACT  
TGAAAGGCACACAGTGTACATGATTATAATCCTTTGATGTAGATTAATGA  
TAGCTAAATCACATTTTCTAATTGCCTCTTTTTTCTATAGTTGATTATTA  
AATTGTAAGAAAAA<sup>A</sup>CTTGGCCAAGCAGCTCCTTAGTAACACATGCATCT  
CTGTT<sup>A</sup>CTCA<sup>A</sup>TATTTTGTGATGTACTCTGAAATTCAGAGAATGGAATTC  
TTTTAAATATTATCATTAAGGAATTTTCTGTGCAGAGGAAGGACCAGTAT  
TTTTCTTCATGAAATGAATATGTTGATTTATCATGCTGAGAAGCATT<sup>CAC</sup>  
CCATAAAAATTTGTTGGTAGCTGTTAATAATGTGATTTATGTTCCAGCAAT  
AGTGTTTTGTCTTTTACAGTTTTATCTTAGAATATTATCTTAGATATTCA  
GAATATCTAATAAAAATTCAGAATATAACAGTCATCTTTGTTGTGCTCCTTG  
CTTAGTTATGCAAGATACATAAATTA<sup>A</sup>AATCTTTTGGAGTAAAGTTATTATT  
ACCAGATGAATAGTAA<sup>A</sup>ATTTGTGTTCAATATCAATTACATTGAGTATATTA  
TCTTCATTTACTCATTTATAAGGTAGGAAATATGTACACCTGAGTATGAA  
ATTTCTTCTTTTTATATTGAGGTTTTTTAGTCAGTTGAGTATGTTGCTGC  
TATATATAAGCCTTAATTTTCTTTAAAAGCTCAATTCTACATTTTTAAA  
GTTTTTCAAAAATTTGAGAACCTCAGGGTTTGAACATGGTTTTAATTGAAA  
ATGTCATCTGTGtttaaataaattaa<sup>a</sup>atCAAATACAAGTTATTA  
CAGACTATCAGAGGATTAACCTTTATG<sup>C</sup>TTTGTAAATCCTGAGTCTTTCT  
TGAAAAGTAACTGGTAAACATTTCA<sup>T</sup>TTTGTACCTTTCTATAGACTTGA  
GATTATATCAGAAGTACTTGGTTTTTGA<sup>A</sup>ATCTACTTACCCTGCAAAGA  
AAATACCTTGTGAACTTAGACATAAAGTCTCTATGTGAATGGATACGTC  
ATTCTGATACTTTCCAAGAT<sup>C</sup>CTGTCTTAATAACACTTTGTGGACCAGGT  
CATGTTTCACTATGATATTTAAAGTTTTATGTAGGAGAATCTGCCCTTAT  
TCATATACATACTCCTGCCTTCACTAGGTTTTATCATTTTACTGTCTTTTC  
AGTGTAGTGTCTTCCATTTCTATCTGCAGGAAGTGTGGTACACTTTGGAGT  
AGAAAATCTTTACTCTTTTGTAGAGAGGGACCATGTCTGAAATTTCTAG

AGTTAAGTACTAATTATTTTTATTTTTCAAAGCCTGTTTCCCATTTCTTCT  
TACCTGTTTAAGGTTCTTTTACCAGGTAAATATATTTTTGAAGATAGGAC  
TTTTGTACTCAAGAAATATGAGGTGAAAGAATAGGCAGAAGAAGCAATTT  
TGAACCTGAAAGAATTGAGATGATCATTAAACAATCTTCTGGTGTATTAAT  
AATTTTTAAGCTGGTAAAAAATAAAAACAAGCTGTTCTATGTGGATAAAAA  
ATGACTAAAAGGAAATAAAAAATAATAGATGATGTACTTTTTCTTTTGCTA  
ATAAAGACATGAGAATGTTGAAAAGAAATTTATCCCCAAAACGTAAGAA  
AATGAAAATAATGTTGTATCTCTTAAGTATTAAAAGTTCTCAGTAATAAT  
CACCATTTGAAAATGTTATTGAACACCTTGTAACATCAGATGTTTATTTT  
CTATATGGTAGATGTTATATCCCTTAGGAATAAGACTAGTGGCCACTGGT  
TTTCTTCTTAAAGTACCTTAGGTTTAGAACTCCATTCCATTAAGGTTTT  
CTTTGGTCTGTAAATGTAGGTAAAGTTTTATGCAGAGTTCTTTTCGATTT  
GAATGAAGAGTGACTTAAGGAGGAAAACAAAATTTGGGTAGTTtctttt  
ctctcttttctctgtctctctctctctctctctctTTTTAAAATAGGA  
ATAACAAAACATATTGTAAGAAGCCTGGTTGGTCAGAGGAGATTGTCTGT  
GTTAATTAGGAGAATGTTTGTGAGGCAGCATGAAATCATTGTAAATTAC  
TGTTTTTAATCTTATCAGATTATTGTTATTTTTCCAACCTTCCCTCCGTTT  
CTAATGttctctcttttctttctttctttcttttttTTCTGGGCCTGAA  
ATTACCTTTTGCTAATCCAGTTTGTGTGGAGAGATAGAGTGCCAGATTGG  
GAGttaggggactccttccttcttttcttttcttttcttttcttttctttt  
ttaaagtgaagaattagactaaattatcttcaagttttcttctagctct  
taaaattaattcttaACATCTCTTACGTAAACATTTGGAAAGATTTAAGAG  
ATATCAAATAatttattcactagtagtactgagtagtactgtctattcatgt  
gctcaccactgtgctgggctgagctgggTTGATTTTACCTATGTTGTGTCAT  
GGGGTGGGAGAGAATTTTAAAGCAATTTTTTTTTCTTGAAGAAAATGAAT  
ATCCCAAAGACAAAAACAACATAAGACAACCTTGAAGGTAGTTGATCGTCA  
AAATCAGAAAAGTGGATGACTTGTATGATTTGTCAATgaagaaaaacttt  
tcctctacactcttaggttcattgtatggaggcctgtgaattaaactgta  
aaacaattagcaagagaaaaatagatttttatttaTGAATATACTTGTG  
AGTTCACAGAAAAATGTGACTCTCCAAACAGGTAAAAATGGGAGTTTATA  
AACCTAAATTAAGGGGAAGAGGTAGAGGGAAGAAAAGGCTTCTATGGAAA  
GAACAAATGGCTTTCTTTCTtttttttttttactataatttctggga  
tacatgtgcagaacatgcaggtttggttacataggtttacacatgccgtgg  
tggtttgctgcacccatcaacctgtcatgtacattaggtatttctcctaa  
tgctatccctcccctgaccccgtccatcgacaggccccgggtgtgtgat  
gttccccctccctctgtccatgtgttctcattgttcacctcccacttatga  
gtgagaacatgcagtggtgggttttctgttccctgtgttagtttgctgaga  
atgatggtttccagcttcatccaTgtccctgcaaagtacatgaactcatt  
ctttttatgggtgtatagttccatgggtgtatgtgccacattttctt  
tatccagctgtcattgatgggcatttgggtgggtccaagtctttgcta  
ttgtgaacagtgctacaataaacatacatgtgcatgtgtctttatagtag  
aatgattataatcctttgggtatataaccagtaaatgagattgctgggtc  
aaatggatcttctgggtcctagatccttgaggaatTgccacactgtcttcc  
acaatgggtgaactaatttacacccccaccaacagtgtaaatgtgtttct  
atctctccacatcctctccagcatctgttgtttccatgactttttaatga  
tcgccattctaactggcgtgagatgatatactcattgtgggttttgatttgc  
atctgtcctaattgatgatgatgagctttttttctgtgtttgttggccacat  
aaatgtcttcttttgagaagtatctgtttatataccttcgcccactttttg  
atgggggttgatttttcttgtaaatttgtttaagttctttgtagattctg  
gatattagtcctttgtcagatgtatagattgcaaaaattttctcccatt  
ctgtaggttgccctctcactctgatgatagtttcttttctgtgtgcagaag  
gtcttttagtttaattagatcccatttgtcaatttggcttttactgccat  
tgcagtaaaagacttcaggacattgttttagtcttgaagtctttgcccat  
gcccattgctcctgaatggattgcttagattttcttctagcatttttatgg  
tttttaggtcttatgtttaagtctttaatccatggttagttaaattttata  
taaggtgtaaggaaggggtccagtttccagttttctgcatatggctagcca  
gttttcccaacatcatttattaaataggaatcctttcccattgcttgt  
ttgttaggtttgtcaaaaatcagatgggtgtagatgtgtggcattattt  
ctgagggctttgtctgttccattgggtctatatactatgtcacaatggg  
ttgccgcacctatcaaccctcttctaggttttaagaccacatgcatta  
ggatttgtcctaattgctctcactccccttgcccccaacccccctgacagg  
ccctgggtgtgtgatgttctcctcccctgtgtccatgtcttcccattgttta  
acttccacttataagtgagaagatgtgggtttttgggttttctgttccctgtg  
ttagtttgctgagaatgatggcttccagcattatccatgtccctgcaaag

gacatgaagtcattcctttttatggctgcatagtagtattccatgggtgtatat  
gtgccacatctttctttaaAAAATCACTTTCTTCCGTGGTCTCTGTAAGTGA  
GGTATACTGGCCATCCTTTAATTCCTTAAACTTACTAcagttgcccttg  
aataacataggcttgagctgcatgggtccacttatatacagatctttttt  
ggtcaaatgcagatggaaaatacagtagtattcatggaatgcaaaaccaagt  
atacagaggggctgactttttctacactctgcttctccaggagttagtaca  
ggaattgagtggtgggtatcttgggtatccaagggagttctcgaaccagt  
cccctgataaatatggaggaacaactTTGTATGCTCTCTGCTATTGGGCTT  
TTGAACATTTTATCATCTTGCTCTTGCCCTCTTGGTCTAGGTAACCTGTGA  
TCTTTTAGAATGctttttaccattttctattactgtaacacttgctcagagc  
caatatacttctcttgatgatagccacataattggctattggttctac  
tcttttctttccaaagttctcctccacatggcagttagagtggttaattc  
tacaatataaaacattatataccttttctgcATTGGATGTgagatccaca  
ggactgtttcctttacatcattacatctcagctcaaaaatcaacttctc  
cttgatgccttcttgatgaccttaattaaagtagcaGGTGAGTGTAAG  
AAGAGTATCTCTCACAAAATCTGGCACTTTGTGTACATAGAGACAATTTT  
TTTTCTTTTTAAAACTCTGCTGAATCTTTGTATATTCTGTCTACCCCTCA  
ATGGAATCTTTGTGTTTTAATTCTTGattataaatctatatttttcaaat  
ttttaaagatattttatataatataatgtagaaaaatataatattttCT  
AACCATATAGTTAATGAATTTGCACAACTGAACTCACCcagaacaaaa  
acaatactctggaagcccctcttgtgctccctttcagtcactacttttcc  
ctgtaggggtaaccaactactattctgacttaacacattaaatcagtttt  
gactgtttttatatttgatgtaagtgaaaacatataatgtgtatgtagttt  
atcttgcttaagagattatgcttgAATATGTAGTTATTGTTCAATTTATTC  
TTACTAATCTTTGGTTATACAGCTTGACGTTAATATTAGATGATACCTAA  
AGGGTCATGACTATTGTCTTTAATCCCTTTATTCAATTTGTCAGAGAta  
cgttttgaagtcataatagtagtgcctccaacttggttcttcagtatta  
tggttggttcttaagtcctttgcctttcaaattgtaccttcttttcc  
gtgtaaattttataattgcttgtaggttttcaaaacagcctactggaa  
attacattgggatttggttatctgtaaactctggttggacaattggcat  
cttaacaatattggtatagttcatgaacatggatatactctccatttggt  
tagaattctttaataagtagtttgaattcttagcaaacagaacttatac  
attctgtagatttgtatcttgggttttttgggtactaTATTTGGAA  
TATAAGTTTCatggtttgctctgctatatactcagtcctcagtagatg  
gcacaaagtcggattcagtagtagtattgaatgagtagaatATCTGCTATCAA  
AGAGTTCACACTCTAGGAGCTGAGAAAAGAGTACATAATTAAGAGATGAT  
ACACTTTAGGGGAAGCTGTAACAAAATCTTCCGGGAGCTCCATGTGGGAG  
CAATAAATTTATGTAACAGATTTCTTTTTCTTTTTCTGTCTCAGATTTG  
AAAGAAGATAAACCTAGGAAAAGTTTGTTTAATGATGCAGGAAAACAAGAA  
GAATTCATTAATAATGTGGTTTAGCCCTCGAAGTAAGAAAGTCA

exon 4

BARD1\_e04.1

CAGCCTGCAATAAAAAAAGATGCA  
AGTGCTCAGCAAGACTCATATGAATTTGTTTCCCAAGTCTCCTGCAGA  
TGTTTCTGAGAGGGCTAAAAAGGCTTCTGCAAGATCTGGAATAAAGCAAA  
AAAAGAAAACCTTAGCTGAAATCAACCAAAAATGGAATTTAGAGGCAGAA  
AAAGAAGATGGTGAATTTGACTCCAAAGAGGAATCTAAGCAAAAAGCTGGT  
ATCCTTCTGTAGCCAACCATCTGTTATCTCCAGTCTCAGATAAATGGTG  
AAATAGACTTACTAGCAAGTGGCTCCTTGACAGAATCTGAATGTTTTGGA  
AGTTTAACTGAAGTCTCTTTACCATTGGCTGAGCAAATAGAGTCTCCAGA  
CACTAAGAGCAGGAATGAAGTAGTACTCCTGAGAAGGTCTGCAAAAAT  
ATCTTACATCTAAGAAATCTTTGCCATTAGAAAATAATGGAAAACGTGGC  
CATCACAATAGACTTTCCAGTCCCATTTCTAAGAGATGTAGAACCAGCAT  
TCTGAGCACAGTGGAGATTTTGTAAAGCAAACGGTGCCCTCAGAAAATA  
TACCATTGCCTGAATGTTCTTACCACCTTCATGCAAACGTAAAAGTTGGT  
GGTACATCAGGGAGGAAAACAGTAACATGTCCGATGAATTCATTAGTCT  
TTCACCAGGTACACCACCTTCTACATTAAGTAGTTCAAGTTACAGGC  
TGATGTCTAGTCCCTCAGCAATGA  
AGAAATCATAGAGGAGAGACTTTGCTCCATATTGCTTCTATTAAGGTAGG  
ATGCTTACTCTGAAATAGACTCTCAGAATGAGGCCAACTATAAAGCAATT  
TCTTTGAGTTTTTGA AAAATGGCATAGGATTACTAGGATAATTAACCTT  
TCACAGACATGATACTTCTCTGAACCAGAGAAGCCAGATTCAATAGGGAG  
AGCATCTCTACTTCAAGTTGGAGCAGTGGCCCTGAGTCTGGGCGCATGAT  
CTTGTAGGAGAAAACCAATATTTGAATATTTTGGCTTTTATTTTGCCAAG  
TGCTTTTGGCTTTTGTCTATTTTACCTTCAGTTTTTATCATTTTGTTTACC  
TGTCTTCATGCTTTATGAATGTAGACAATTGCTAAGTTATACAGGCAAC

BARD1\_e04.2

AATGTTTACTTAGTAAAAAGCCCATATTTACCATCCAAATTC AACCAAA  
ATTTGGAAGGTTGAAAGATGTGGTCTGTACATTTCTCCAATGACCGGGAC  
ATTTGACTATCAGAAATGGCTCCTCCAGTTCACCACAAAGGAGCTGCTTT  
TTACCCTACAATCAGCTGTTCCCTTTACTGACCTGTTTCATTGACGTTT  
TCTCTTTAATTATTGCCTCAACACCTGAGATGTGGCAGCGTTTTATGGAA  
CCTGGCCTGTTTTCTGAACACTTGGCAGTGGTTAATCTTTGAAACTGACA  
CAAACACTACATGTGAAATAGAGCAGTAGGCACCATAGCTTTATAAGCTT  
TGCTCTGTGATTTTCATGCAAATGTTAGGAAAGTATGATATGGTAGACCTT  
AGTACTAAATTAGGATAGCTTTTATGCAGTCTCAGCGACTGTACGTAGTC  
AATTCACCCAGGAAATCCTTTGGTCTTCTGGATGGGTAGAGAACTTTGGG  
ACACCTGGGAGGAACCACTTGGAGGTCCACAAACATGAGGCTGGTGGGCA  
ACATAAAACATTTGAGAAGAACATGGAGTAGACATTGAGTGTGTCCAAA  
GATTCCTGTATTTCTGTGTGGAGAAAGGGAATAGCATAAACTGAGCTTAT  
CCCAGCTGCTGCTGGTTTTGTTTTCTTTGCTTTTCTTCCAGATTAATGAGG  
AATAcagtcagctctgtgtatctgtgcattctatgtttatgggttcaacc  
aactgcgaatcaaaaatatttgggagaaaagccaataacaatacgaata  
aaaaaatgcaaatcaaaaatatacgtataacaactatctacatagcattt  
atattgtattaggtgttataagtaatttagagatgatttaaagtatactg  
gaggatctctgtaggttatttgc aaatacatcattttatatagggaatct  
ggattttggtatctgctgggattctggaaccaatccccacagatactga  
gggatgactgTACTCTATTTCTGATACCAGTGAGGCAGGGACCTTACAAC  
ATGACCACATATCCTTTGGACATGTTGAATTTTTGCACTTGGCTCTGGTT  
GTGTTTTAGTTTTGATTTTTGCAAAGCCTGACTTAACAAAATTAGACATTT  
TTTGTCTATCTCTGTTATATATATGTATATTATATGTACATATAAGCTATT  
GTAAACAAAGTTATAGCATAAGTAGCTAGTGAATGATTATTTTTGTTC  
ATTTTGCTGGCTAATACATAGTAATTTATATATTTTTGCTTTCTGGGAAAT  
TTTTGGACTATCAGGCAAGCATTACTTATATTGGTGGCGACTTTTTCTT  
CTAACATAAGAATAATTTATCTTTATTAATGAGGATCCCTAGGGTCTAG  
GCcagagttttagtaagttctttcttaaaagtgagtttagagtaaatggtt  
tcagctttgcaggccatgaaatctctatcatagcggttcagctctgcctt  
cttagtgcaaaagtagccacaggcaatagcaactaataaaaacttacgt  
acaaaattgggtgactggccataggctatagttgcctactcttgGTCT  
AGGCATGTGAAGAACTGTAATAGAATATTAAGTCAGGATAAAATGATGG  
CATGCTCCTGTCTTGGTGAATTTTCTCTATTAATACGTTCAAGATTACTT  
CATATGAGTTTTGTGAGTTTGTCTTAGAGTTTTGCCGGAATTATTAATCC  
ATTTTTATTTCTTGAACCTAATTATTAATGCAATTATTGTCACCAGTT  
GTCAGATTATGTTATGGTACattttttaaaagttatttttattggtttt  
aaaatCACCAATTAATAGTGTCTTTTTAAATTTTTTTATGAGTTGAATGT  
ATGCCTCTCGCCTTAGCTTTATTTTAAATAAATATATCCTTAAATCAGAT  
TTGCTtataaaaatataatttatataatttttttCTTTTTTGGGGGTGGGG  
GAGGGGCGgggacagactcttgccctgtcaccaggctggagtgcagtg  
gcacaatctcagctcactgcaacctccgcctcctgggttcaagcaatcct  
tctgcttcagcttcccagtagctgggattacaggcacctgccatcatgc  
caggctactttttatatttttagtagagacggagtttcacatggtggcc  
aggctggtctcgaactcctcacctcaggtgatatgtcctcggcctcccaa  
agtcttgggattacaggcatgagccaccatacctggccAATCTTTTTAGA  
AACAGTTTTCATTTCTATCCTAATTTTCTCATTTGCAGCCAAGAA  
TGAATAAATCTATGTGTACACATATTGCAATTCTGCTATCttatttatat  
tttgcaccacctgcttcagaaaaggatttgaagtggctctaaagttaa  
gctactataaaaatGGAACAAGGAGTTGGTAAAGAGGAAAGAGTTACTACA  
ACTGGAGTGAATTTAGTTTTGGTGACCTTTAAGGCAGCCAAAGCAAATAA  
GGGGAAGGACCAGGTTTTGTGCTGTCAAAAGATAATGCATCTTTTTTTGGT  
GGTGATTATTTATGTTTTGTACCCACCTACTTCAGAAAAGGATTTCAAGT  
GGCCTAAAGTTGTTTAGACTTGGCTTGTATTGTTTCTTAAGCATGTTGGT  
AACTTGCAGTTTCTATAGTTTGTAGCACATGTTTGCCTGAGCATCCTTG  
GTGTATGCACCGAGGGCAGAGAACCCAGCAGGAGTTTGTCTCCTGCACT  
AGTTACCTTCCCCACTGACAGGTAGGGCTTTACTGATTGATTTCTGAGCT  
TGGAAACATTTAATAAACATCGTATAAATACCTTGCCCCAACTACCTC  
TGGGCATCATCATTTGGCCATAACCTTTCCATAGCTACCACCTACTGGCA  
GCTACTTCTCTTTTCTTGCCCTACCCTTgcattaattttctattggtg  
ccaaaacaaacttccacaaagtttagtgattcaaagcaatgcaattaatt  
ttcttacagttctgtacacctgaagtctagtaggggtctcatcacactaa  
aatcatggtgtcagctgttttcaggagggtccaggaaagaccatttcat  
ttttgcttggatgggttggcagggacttcataattcttgtggtaagactga

gatccagatcttctgctgggtttcagctgaggggtggttccaggttctag  
agactctcacattcctttagttcgtgggcctcttcttcatctcatccagc  
agcagcagattgagtccttctcacatcttatctttctgacatagccagaa  
agaccctctgcttttaagaattcatacagattaaattgggctacttgagaa  
atgcggaataatctccccatctcaagggtgtgtccacttaattacactgca  
gtgtccctttcaccacgtaaggtaacatagtacaggttctggggattat  
tcgtgtgtggacatcttttgaggTCGTAatcttttgaccacaccactgaa  
gtagcttcctaatttccctttgtatttctgagtcagttctctatgtaa  
cagccagagtaatctgaccgaaatcaaaattatcatttctctgctcTCCT  
ATCAGTAAGTCTTTTTTATACCCCTCTTCCCTATTTGAATATCTTCATAAC  
TCATGTTCCCTATTTGAATGTCTGCATCAGCTATGTTAAACTGCTATTGAG  
AACACTGTGTCTATGAATGGGAGAGTTTATGAGAAAGCTTTGTGCGTAAGT  
AGAAACTAAGATACTCAATTGTTTATTCTTCTGATTTATTACCACAATTAC  
TTTTGCACCAACCCAATAGAAAACAAAATACTAAGGATATAGAGAAAATT  
TTTTATTTTCTATTATGTCTGAGCTTTGCTTGAGAATTTGTGCCATCCTGAC  
CTTCCCCTTTTCTTCCCCCACACCCTTCTACCAAGTTCTCTAGCACAAAT  
TCTTAAAATGGCAATGACTACTCATAATTTATGCCACAGCAATGACTTAC  
TGTGGAATAGAAGAATGGCTTGAAGCTGGCATGCCATGATTTATTAGTGA  
TGTAGACATAATAGATAATGTTTTGAATGCAACTTACAAGGCATGGTATG  
CTTAGAACATAACAAAGGTGATGAAGATCCCCTGGAGAGAGAGAAGATCC  
CTTGTGAGGAGTCTCATTTAGAGTTTAACTTTGTAGTTTATTATACTTGA  
AGACAGTCACTTATATTGTGTGTGAAATTATATATCCTTCATAGTAGCT  
TCATGAGAAGGTAGCAAAGGAAACAAAAGCAGCCTTGGCATATGTGATAT  
TTTCAAGAGTTTAAATTTCTAAAACACCTCCTGGAGTCAGTATCTATTTT  
CTCCTCTGTCACTACCACATATGTATAAGTCTGCTTTTGTAAATACCAGT  
AACTTATTGTGCCATTGACCAGTTATCAGAATTATCTGTTAAATTAcag  
gcatacctcatttaattgcacttcacttttttatgcttcgcagagagttt  
tgtttttggtttttggcaatcctgcattgagcaagtctgtcagtgctg  
ttttccaacagcctatgctcagtggtctctgtgtcacattttgtaat  
tctcacaatatttccagatatttccactattgttgatctgttacggtgat  
ttgtgatcagtgatctttgatgtaactattgtaattgctttggggcacca  
caaaccctggccatgtaacatggcaaaacttaattgataaatgtctttct  
gactattctgcttactgataattctcccatctctctccctttgaaatccct  
gtttcctgggacacaagaatattgaatttaggtaactaacaaccctaca  
atgtcctctgagttttcaagtggagggaagagtcactcatctcttacttt  
atataagaagctagaaatgatgagtgaggaaggcatggtgaaagttgaga  
taggcaaaaagctaggtctcttgccaaacagccaatttgatgaaatgcaaag  
aaaaattctttaagtaattttaaagagctaccctggtgaatacacaaat  
gagatgagaagaagcataaccgccttactgccgatagaggagagttgg  
aatggtctggatagatgatcaaaccaaccacatttcccttaagcaaaacc  
tactccagagcaagatcctaaatctcttcaattctgtgaagactgagaga  
ggtgaggaagctgcagaagaaaagttggaagctagcagaggttggttcat  
gaagttgaaggaaaaaagctgtctccataatataacaatgcaagttgaaa  
cagcaggtgctgatggagaaaactgcagcaggttatccagaagatctagcc  
aagataattatgagagtgccacactaaacaacagatttcagtgaaagttga  
aacagccttttggtggaagaatatgccatctgtgtctttcatagctagaa  
aggagaagtcaatgcctggcttcaaaggacaggctttcttggttaggggct  
aatgcagctggtgacttgaagtggaagccaatgctcatttaccatttaga  
acaacaaagcctgggtgggagcacatcttgacagcatggtttgctaaata  
ttttaagcctgctggtgagacctactgttcaggaaagatattcaaaatat  
tactaattgacagtgccacctagtacccaagtggtctgatgaagataag  
gacattaatgctgttttcatgtctccaacaaaacatcaattctgtagcc  
catggatcaaggagtaactttactttcaagtctgttacttaagcatttt  
gtaaggctatagctggttagatgggtattccacagatgattctggaaat  
gactcaccattctagatgccattaatatcattgatgattcatgggaggat  
gtccaaatgtaacattaacagtagtttggaagaggttgattacagttt  
tcatggatgactttgagaggttcagaacttaagtgagagaaagtaactata  
gatgtagtagaaatagcaagataactagaattagaagtgagcctgaaga  
cgtaaactgaattgctgagcctcatgatcaaaacttcaatggatgagcgt  
tggttgatagatgagaaagaaagtggttctgcagatggaatctactt  
ctggtgaagatggtgtgaacactgttgaaatgacaacaaaggatttagaa  
aattatatcatcttagttgataaaaacagcagcaggggttgagaggattgg  
ctccaatcttgggagaagttctacgcagataaaaatgctaccaaacagcgt  
cacatgctacagataaatctttcatgaaatgtcagtggtgtagggcact

tcattgtcctgatttaagaaactgtcacaaccacccaaaccttcagcaac  
tacctgcttgctcagtcagcagccagcagcatcaaggcaagaccatccac  
cagcaaaaacaattgtcaccatTTTTtagcaataaagttatTTTcaattaa  
ggtctgttcattTTTTTtaaaaaacataatgctattgcacacttagtaga  
ctacagtatagtgcacataaactTTTtatatgtgctgggaaaccagaaga  
ttcgtgtgacttgTTTTattgcaatatttgctTTatcgcagtgacctgga  
actgaactgacagtatctccgagatatgcctgTATTTTATTTCAGTAAATT  
CTAAGAAGCTACAGAAATATTTAACATATTTTAGAGCTTCATTCCAGTTG  
GTTTCATTTTGTTTTGTTTTGTTTTAATGGCATCTAATTGCCAAGAAGGGAA  
GTCTTTGGTTCCTGGTCGGTTCATTTACATGGAAAAGCTTAACCATGCTA  
GGCAAGTCATTTGTCTTATACTTAATTGTAAAGCTTCTGTATTGTTTTTAT  
GAATATGTTTTATTAATGGTATTTTAGAAGAGCTAACATTTATAATAAGGA  
AAAGTTTTGTTTTTATGTGTGTGTTTTTGGAAAGTTAATTTATATTGTTG  
GAATATGTGTGGATCTGCAGTATGTACAAATGTGTGAAGGATCTTCCCTT  
TGATTGAAAGATTAGGAATAAAAGATTCAGTGGGACACACACACTCTT  
ATTTTCAGCCTTCAGTGTATTACTTGAAAATACCAAATTCATTTAAAATT  
TTTAATAAGCCTTGGCAAATACTTTCTTAGATAAATTATGTTTGCTGTG  
GTTTTAAGAAAAGTTCAATTATTCTTTCAAGTTGTGAGGAGCCAAAAGTG  
AGTACTTGAAAGTAATTTAAAGAAGCCAGAATCAAACTTAATTTATTTT  
CTGGCTACTTCATATCAGTTCAGCTATTCCAGTTACTGTAGACTCTATC  
TAATTATCATAATTTTATTTATGCGCATGACATTACATTTACATGAAGTA  
GAAAGATGAAAATATGACAAAACCTTTCAAGTACTAGAGAGGAGAAAGCAG  
ATTGGTTATAAAAAGCAAGCCGTTTGCTAATCAGCTATACAGTTCAGGGG  
TGGGGAGATGTTAACAGAGACACTTTGATAATATGAAGAGGTGACATG  
AAAGAAAAATAGCAACTGTCTAACACCTTAAAAGAGAGTCTACTTGAT  
TCTTTAAATTGTCACTCCGTTTCTGTTTGACTATTCCCTTGAGACTCTTC  
CATTTCACAAATTGTGTTTATATTATTTTTTAAAGCTTCTTTAATTTTTTT  
TTTTGCATTACCATGTAGAATTAGAATGGGGAAATCTTTGAGAAGGTTTT  
TGTGTGTGAGTACTTTTATGTTAAAGATAGGGAATGTGTGTGGTCTGGC  
AGTTTATCTGCTCACTTGTACAGGATTGTTTTGGAAAAAAAATTTGTA  
TCTTGGCAGATATTCCTGCATTCATTTGTAACCGTTATGAATATAAAGCA  
AAAGTTgcaggggctcacacctgtaatccaataatTTTggaagctaagg  
caggagattgcttgagtccattagtttgggcaacatagtgagaccccat  
ctctacaaaacaataaaaaaattagctgggcatggtgatgatgcctag  
cagtagcatactgctgaggctgaggcaggagaattgcttgggcccaggag  
cttgaagttacagtgagctatgatcatgccattgcactccagTTGCTAAA  
TACATGATAACTTGCTCTAGAAGTAGAATTTGCACTGTTAAGAAATCTGG  
GAAAATGTTGCTTTTTTTTTTTTTTTTCTGAACTGGGGTAATTA  
TTTGAACCTACAATCCTTTTAGACCCATTGAGCATTAAAGGTCAATTTG  
TTAATTTAGGAATATAAAAATGTATGTTGCATGAGAATTTACTTTTTTAG  
AAAACCTGAAGATTTAGAAAACAGCCAGAGCAGAAAACAGAGACAATTA  
GATATAAAAAGCAtTTTTTTTTTctgaggtagagtctcgctctgtcgc  
ccaggctggagtgagtggtgtgatctcaactcactgcaacctccgctc  
ctgggttcaagcagttctcctgtctcagcctcctgagtagctaggattac  
aggcgtgtaccaccatgcctggctaattTTTTgtgtTTTTaggagagacgg  
gatttcaccatgTTggctaggctgatctcaactcctgacctcatgattt  
gcctgcctcagcctccaaagtgtgggattacaggtgtgagccaccacg  
tctggccAGCaaaatTTTTtaaaaagaaaaaaatcaaatattatattt  
aGGAGAATTAGTGATTTCTACATTATCAAACCAACAGAGGAAAAAATTT  
CAGAAAAAAGTATTGGGAGAGGGGTTGGGTGGGGAGAGATTTATCTACTA  
AAGAAGCACTCACGAACTCATTGAACACAATGTTATGCATGTAACCTCT  
GTCTATAGCTTTTTATTTGGTCTTTTTTGAGAGTATGCTCTGCTAGATAT  
TTTTGCTTTATCGTCATGGACTTAGGTACTGTACCCTGCCCTGTTATCCT  
AAAAGAAGTATTAGTTATATTTGCAGTGAGTGGTGATAATAATGTAATT  
TCAAGAAAATTTTACCTTCATCCCGCTGCATAATGCCTCCTTCTTCT  
AAAGCCTGACATTGTTTTACAAAGGGACAGTATCCTTTATATTACAGCTA  
GAGATTTTTAAAAAGGCTTTAAGAGTTAACGGATACTTAAAACGTAATAT  
GTAATTTAAATAAATGATAGATGTAGATGTAGATCTTTCCACATTACATGAAG  
GCCAAATTTAAGAGACCTGGTATTAGATAGCTGGAGGATTATTATCTCT  
CACTTCTAGGAAAATAAAAAGAAGAGTGGGAGGGCAGACTACCTGAGAC  
CAGTTCCCCAGAACTCCTTTGCCACAGTCTACCTTCGCTGGAGGCTGGCA  
GCAGAGGGAAGCTATTTTTTTTTGTCTTACTTCAAGACAGCTTTAAAGTGA  
CCTTAAAAGTCTACTCATTTATAGTAGGATTTAGTTGGATCATGACACAC  
AAGACACAGAAAGTTCAAACCTGGAAGGGGTCTTCAATTTAATGCTATT

TAATAATTGACGGTGTCTTAATATGAAAGTCGAATTAATAATTGTCTGCCT  
TCAGAGTATTTTCCTTGCCTTGTGCCTCATTTTAATTCACCTATTTCCCG  
GATCTTGCTCATCTGATTTAAAAAGAGGTTGTGATTTCTAAAGTAAAGT  
ATTGTATTTCTTACTATTCCTCATCTGCCTTCTCCATTGCATCAGTGTGC  
TACTGTTGTACTAGTTATAACATTGTTGCATAGCTCTCCAGAGTACTGGA  
ATAGAGAAATAGGAAATGAAAACCACTTGTAGAAAAGACTTGTAAAG  
CTACATTACAGAAGCTCTATTTTCGTATAGTTGAATTAGTTGATAATGGG  
GGTGATTTTAGTCTTGAACCTGGGCGGGGAGCAGGGGATAAAAAATTTAA  
TGCTAATTCTGTGGCTGATTTGAATAGTTTTGTACTGATCTCTTTTTTT  
GCCATTTTAAACAGAGCAACTGTTGCTTCCCTAGAAAATGTTGAAACAAATA  
AGGTGAATATAAACTAAATGTATTAGGATGGAGTAACTGCCAATAAAAATG  
GCAGTTTTTGCTGTTTTTTAACTTTGGTTTCACTGAGTAGTCTTCTGGG  
CTAAACAGTTTTGGTTGTTTTTAAACAATACTCAGAAGCCATTTACAAAATG  
CTCAAAAATTGTTTTTTTACAAGTGAATTTATGGCTTTTTAAAACCTTCAT  
TGTGAGCACATGATCTTTGGCCAGTGTCTTTATTTGGTACCTGAAATGA  
ATTTTGAATATGGCTTTCTAATAGATTTTGTAGTCTATATTCAGCATGA  
CTGTACTTCTTGATATCTCAGAATAATTTTATACGCAGACAAttcttttt  
tgttttgTTTTTgagacggagtcttgctctgtggcccaggctggagtg  
cagtgacatgatcttggctcactgcaacctctgcctcctgggctcaagtg  
attctcctgcctcagcctcccaagtagctgggattacaggctggcaccac  
catgccccgactagttttgattttttagtagagacgggtttcccatggt  
gaccaggctggtctcaaactcctgacctcaggatgatccaccacctggc  
ctctcaaagtgttgggattacagggcgtgagccaccacacccggcTAATA  
ATTTATTAACATCATGAACAGTAGCCTTAAGAGAAAACGATTTAAGTTTTA  
CTTTATATTGAAGAAGCAGCATTTAAAAAAGCTCAATATTTTCCTTTCT  
TTCCTTAATGCTTTTTAATTTCCGTTTTGTTTCATTTTTCTAGGGCGACAT  
ACCTTCTGTTGAATACCTTTTACAAATTTGTTGTTTCTAGGGCGACAT  
TGGATGGACACCATTGGTAGTTGTCTGGTTTTTTATTCTCATT  
TTTCTGTGTTTTACAGTTCTTATAGTTTATAGTTATGTAGTTGTCTATAT  
ATCATCCTCTGCCACATATACTCTTTTAGTCTGAAGAACTTATGTTTT  
ATCAAGTATGAGAACATGATTACTTTCTTCTAGCTTTTCATTTGTGACA  
GGCAAGAAATGGTTACCTTTTACAGACTACCTTTAGATTTAGGAATCC  
ATTTGTACTGTACTGCAGAATTTAGCTAATGTCTAGAGGTAACAGCTACA  
GCTGACATCAGGCTCCATTCTGTAGCACTGCATGTCACTGGAACCAAAT  
TCTTGGAACAAAAGAGGTCGGAGGAACTGAGTATAGGAAAGTGATCACA  
AGGAAGTAATTCTCACTGAGGGTCTATCTTAGCCTCACTTATACCCTATC  
CAATTGTAGATATATAAGGCAGTAGAAATCTTTGCTTACATTAAACATTT  
TTAAAGGTCTTTGCTTATTATTACTAAAAAGTGTGAAGCATAATCTGGA  
AACAGAATGACACAAATACTTGGAAACAATGGTATGTAGGCCAATTACA  
TTAGGACAACAATGAGATTTGAATGCAGCCACAGAAGTGTGAGCAAATGA  
AGTGGATGCTTATCCTGTAACCTAGAAATTCAGCCAGAAAATTAGGAGA  
CTCTCAGTAGGCTAGGTGCAAGAAAGCTGGGAGAGTTTAGTCTAGATCAG  
TCGTTTTGCTGGTTGGACTCTACTGGCTGGCTAACCTTTTCAAAGAAAG  
TTAATTTTATTTTTTTCTCAAAGCCACTAAGGCAAGTTGTAGTAAAGAT  
TGTTTAGTGATTTAGAGGGTTTTAGTGCCTAGTTTTGGATTCTTTCTCCTA  
AAAATAGACCTACAGATGTTGAGTGTGATATCACTTATTATGAATTGAAA  
TTGATGTACTTAAAAAGTATAGAATGCCAGAGATTTATTAGAATACAGCA  
TTGTTTATAGTTTATTAGACATAAGGAAAGATTTGGATGTAAGGCATCTT  
TGAACACTCCATTGTTGCCGTTTCTGTCATTCAGCAAGCTCTTTTTGTAT  
TCCTACTCGTGTATTTTCTTATCAATAACAGCAGCCATACAGCAATTT  
GTAGTTTCAGCAAATAGCTTATCTTAAAAGCATTCTTCACGGATACTTA  
CTTTGTTGCATGATATGTGTATGTACTGGTACAGATTTTATGTATCATCT  
TGTTATTAATATGTAGACTTTTTTCTTAATGTGTTACATTTATTGTAGA  
ACATTTAAGGAGCTACCGTTGGTTTTAAACTACATTTTCTTCAAAAAAC  
AGAAAAGTGCTTGACCCAAGGCTCAAATGAGAATAGCCTTTCTTTTTTTA  
TGAGTTACACAGATCTTGATTGAAAGATTATTAATAGTAACTTTCACTCT  
GTCAGCAACTTATAGTGTTTTTGAGTATTTAGGTAACATAAATTTACTG  
CCTGACGTTTACATTTATTTTTTCTAAAGTGTGATATTATAAATATCATCCA  
TTGCTCTTTCTTATCACTTCTTCACTTCTTTTTTCAA AAAAATTTAATTAG  
CATGAAGCTTGCAATCATGGGCACCTGAAGGTAGTGGAAATTATTGCTCCA  
GCATAAAGGCATTGGTGTGGGATGATGAGTAAATGATGATGATGATGAT  
CACCACCTTCACCGATGCAGCCAAGAATGGGCATGTGGATATAGTCAAGCTGTTACTTTCC  
TATGGAGCCTCCAGAAATGCTGTGTAAGTGTGATCAACGTA AAAAATTTATTT  
TTAAAATGGACCTATATTCTTGAATCAAGGTGTGTGATAAAGCAGACTTT

exon 5  
BARD1\_e05

exon 6  
BARD1\_e06



AAATAGTCAAGTTGATGGCTTTCTTCACTTTCACAACTAAAATTAGATG  
TGATCATCACATTCTGCACTCATAATCAGCCTTCATGCCCTTTTTATGAT  
Acagttggtccttcatattcttgggttctacacttgaggattcagccaac  
tgcagatcaaaaataattgggaaatatcaatgacagatcggataaaa  
atgtgttacatatataccatggaatactatgcaactacaaaaagaatga  
gatcatgttttttggggcacatgatggagctggaggccattatcctta  
gtaaactaacgcatgaacagaaaaaccaaataccgcatgttctcacttata  
agtggagagctaaatgatgagaattcatgaacacaaagaagggaacaacag  
acaccagagtctacttgagtgtggaggatgggaggaggagaggagcaga  
aaaagtaactattaggtactaggctcaatacctgggtggtgaaataatct  
gtacaacacacccccgttacacaagtttacctatataacaaaccttcaca  
acttaataaaaaacctagaataaaaagtttaaaaagggaaaaaataac  
actacgataataagtaatataggtaaaacaatatagtataaatatttata  
cagcatttcatactattaggtattacaagtaaatctggagatgatttaaag  
tatacgggaggatgtgtgtagtttacaagtaataactatgccatctttaa  
taagaaacttgagcagcggcacattttgacatcacgggttgaggaaacaa  
ttccccatggatagcaatggggataactgTGCTGACATATTTGGGGGAGA  
TTTACTTTCTTAATTCAGAAACAGTTGTCAATTTTGGAAAGCTTTTCAATTA  
ATGGAAAAATTTACTTAGTGTATATTCTGTAGATTGATTTACTTTTA  
ATAAGCAGTTATTGTAGAAATAATTTATTTTGTATGCTTCTAATAGTTTG  
GAATTATTTTAAATATTTTCAATCCATTTTATTTTTTCTGTGATTTACT  
ATTACAACAGGTAAGCATATAAGAATTTAAATATTGGGCCGGGGCAGTT  
GAATTATTTCTTAAATTTTTTACATCATTACATGAGGTTCTGGGTGAAC  
TTTTTGCAGTGTCAAGACAGAGATGCATTAGTGAATGCCAGCAGCTGG  
ATTTTAAAATTGGCATTGTCAAGAGTGTCAAGCAAATGCTGTATGTAG  
ATTTTGTATCTTTAATCTGTAACCTTGGTTCATGTCTCCCTATGTAGTATT  
TTATTCTTTTCAGTTAATTAAGTAGTTGAAATGAAATGCAGGTATTGCG  
TCTCTGCCCTTGTGCTTCTATAGGTTTAAAAGGGCACAAAAAATTA  
GTTTTCAATGGTAACAGATGCAAATAAGAATTATAAAATGCAGGGCTTCT  
AGGTCTGAATTTTTTATTGGTAATTTTAAACATAATTGAAAACCAAAT  
AATAATGCAAGAATGTACCATACTTGGTGCTGTTAGTTTCAGTAAATGT  
GTCTAATCTCTTTTATCTCTCATCACAGGTTATAAGATAATTGGGGCAA  
TTCAGGGGATGTGTATATTCTTCCGGTTTTTATTTgtgtgtgtgtgtgtg  
tgtacacacgtgctgtgtgtgtgtgtgtgtgtgtgtgtgtgtgtgtgtgt  
TTTTGTAAGGACCTAACCATATGACCCTCCCATATGTGTTGCAAGCTATT  
TGGTAAACGCAATTTATTGCTTGGGTGAGGTAAGTACTAGTTTTCATT  
CTAGGGTTCTTAAATCAGCCATGACTACTTaatggatggagcactggtc  
agggcgttagggaatctagcttttatttgtgactccattactgactgtat  
agcttcaggcaggtaatttctgtgccttgggtgtcctcacctataaaaca  
tgggtgatgcctgctgacatttctatttcttcagagcatagtgaggattaa  
tgagCCAAAACACAGAGCCTGTCTTGTGGTTGTACACCATGATTCTGCA  
CTGCACTGTGAGGGCTTATTAATATACAAGGAGTGGCATGAGACAGTGAG  
TGAGTCTGCCTTACAGGTGCCTTCAAGTGTGGTTTAAAGTAGGACTACCT  
AGTGAAGTGGCAAATTTAGGTATATCTGTTCCCTcagcactgtccagtaga  
cctttctgtgggtgggaaatgtttatatactatgctggacattcagtagc  
cactagtcccttactattgaacacttgaaaattagctattgctaccaa  
ggaataaattttaaaatgtattttatttttaaccatatgtgccagtgacta  
ctgtgttggacagcTGGTTGATACAGCTGGGCAGTTGGGAAGTAGGGTTT  
ATTTACCCAAGAGGTTGGGATTGATATTGGATAAAGGATAGTAGGGCAG  
ATGAAGGGACAGATTTAATCCTAGGGTACAAGAGTATGGTGGCTGTTTCT  
AAAAATTTCTTTCCAGACTATTGGTCTTCATACTTTTTTCTGTGTTTT  
TTGCCTCTTAAAAACATGTGCTAGTcattgttgttcatctgattggcttt  
acaaatttctgactgttctcctccttttcaggttacttttctttattca  
ctctccatcctgcagccagagcacctgcagaagaacacgagctctggccaa  
gtcatttatttgccttaaaatccttccgtggcttctcttaattgttttaa  
aataaagggttaaatacccaaatatggtttataagaccctggatggtctgg  
tgctacttctcctctctgttctcatcgggtcttcacagcttctcctttccc  
ctttccttcaagcattttttgcaccagcttttctgaatttttgtttcctt  
aaaatatgtagggctttttacctcctagcctttgtacatgtctttgcatt  
gtctagaatattTGTTTTTGGTAGCCAGTTTCTCATTGCGTTTCACCTG  
GGTTATCCTGTCCTTTTGGCCACCTTTCTGATGTGGTACTTCTCCCCAG  
TCGTAGGACTTACTGTTTCTCCCTTCTCGTGAGGCTGTAAGCTGTATGG  
GCCAGGGATCATGTCTGCCCTCCCTAGTTCTGCCAAGTGCCTAATGTAGT  
CTGTATCCACATTTGTTTGTAGAGTGAATTAGTGTTTGAATGAATGAAGA

TTATGGTATACTTTTTCTCTTTTTTTGATAAAAAGGTCAGATGACATGAAA  
ATGGGAATTGCCTCCTTCTGCCACTACCTTTACTGTGTGACAAGATGTCT  
AAAACCAAGTTTTCCCATATCTGTGCCTTTTCTAAGGTGGTTGAACTGGTT  
CCTGGCAGCTTTTGGCCAATTGGCATCCATGGCATGTTACTTTTTGTGGG  
ATTGTGGCTACCCAAAGTAATTCCTATAGCCTTGACTTTTAAGTGCATGC  
TGTCTCAATGTTCTAGAGACTGTCTTCTAGAATTAGGTAGTAACAGGTGA  
GAATAGATGAAATTTATTCCTGCCCTTTCTCCATTTCTTAAGGAGATCA  
TGGGAAGGGGGTCTGGAGCATGGAGACTATGGGATTCTTACTACTCTTCT  
ATTTCTTCTGAAGCTCTTACTCCTTATAAACCATTAACATCTCAAATTC  
TGGAATCTGAGTTGGCAAACAACTTTTTCTGTCTCTGCTTACTGTATCT  
CTTACTCTTGCTGGAACCTTTTTCTCAATAACCAGGCCTGAACTCTTCCC  
ATGGAAGAAGGGTAAGAACCAGCAAGGGCAAACACCATTCTGTCTGACCC  
TCTTTAGGGTTTTGCTACTTTGGCTGATTGAAGAAGTAAAGTCTTTTTGC  
TTACTGTAAATTTCTAAGTGGCCTCCTTTAGCTCTAGCATAGACATTTG  
GCTGTGTTCTTTCATGACCTCAAGGTTGAAGTTTTCTCTTAGATGCCTTCC  
TTTCTTCTTAAGTCTTCTCATAGTCCCTCCATTGCTCCTTTGCCTCATCA  
TCCCCTCAGTTGTCTGCCTGCTTCTGTTCTAGTAGGAGTGAACAGTGAAC  
AGTCTGTTAAAGCACTGATTATAGAATGGTGTGAGGTATGCCTTCATAGC  
ACGGTGCTCACAGTAGTATGAAAGTCTCAGCTAGGGCTGAAAGTAAAGACC  
AGAGGAAGTACAGAAGGCTTCTGGAAGAAGAAGTTCGAGTTTTGA  
AAAAATAGAACGGGAGGATGGGATTTTGAGAAAGATAAGATATGGGTGCT  
AAGGTACTCAAGGCCAGACTGCTTCTTCAATTCATTCTAGGAACTTCCGTT  
AGTGATGTAAGTGAATAAAAAGGATGGAGGAGGATGAGAGGCCAGAGAAG  
ATGGGCAGGGCTTTTGAAGGCTGTGTGTGCTAAACAGAGTGTGATTTT  
AAGTTGAAAACCTCCTCCTTACACTGGGGaggggaactcagttaagaggt  
ttgtccagtaatccaggaaaggagtgatgagagtcaaatcaaagtagtga  
cagtagtggtgggagggggggggGGAGAATTAGCCATATTTATTAAT  
TTATTCTTCAAATGAAGTTTGATTTACTTTGTACTGTTTCAAAAATACC  
ATATTAGGATGTTTTGAAGTTGGGTACGTACATAGATTCTAGTGGAGTAC  
CGATTAGGATGTTGATTGAAATTGGTAAGTATATACAGTGGATTAATAAAA  
GTTGGTTTTCTATCAAGTTCGATTGATAAACTTTATGTCGTGTGTTATTT  
TAAATGAATACATcagtttgctaggtttttggttaggaattttgcat  
aaaagttagagtgatttgtgattttatctttcacttctgtcggtagatt  
ttgatatacaagttagactcataGCTTCTAAAAAGTAATCAGGACCAAGC  
TGCATGTCTCCATTTGTTAAGCATTCTGTTATATATATCTTAGTAAAGT  
TTTTAGTCTGTTTCATATATATGTATGTAGGTATACACATGCATATACCT  
ATTAATTGAGGTTATTCTAGTTATagactgagatcccttgcccaaatg  
cttgggatcagaagatattgggatttctttcagattttggaatatttgca  
tatacgtaatgagatgtcttagggatggttctcaagactaaatgtgaaat  
ttatctgtgtttcataaacattttatcacatagcctgaaggtaatttta  
tacaatattttaacaattttatgcattaaaatggttttttaagtactgt  
gtttggaaatttccgcttgtgtcatattgggtgctcaaaaagtttccaatt  
ttggagcgttgcaaatccagatttttggattagcaatgctcaacctgTA  
TAGTATTTGATTATTTGTTGCTAGTAACTGGATATTGTGTTAATAAATA  
TAATTTGTTATTCTTGATATATAGGAGAGCTGTTGATTTAGTACGTTTCT  
ATCCAGTCAACACCTAATTCTAAAGatctaattatcatttattaacttct  
atcttcttattgcatttgtcagtgcttccagaatgatgcaataatgatgat  
agttggcttgcctgttttgttcttcttttttaaaaaagtactgacccat  
agagttatagtcaataactaatatccatattaatacaaaagattaatgttc  
tttattgcccctgtggaagctttctccctttattattttctaacaagact  
gtattttattttattgaatgattttcagcttctgcagagatgatcTTATA  
Ctttttttggtttttggataggggtctcactgtgttgcccaagct  
ggcttgaactccagggtcaagcgatcctcccacctcagcctcccaag  
CTTATGCTTTTTTGAActattgatgttgttaatacatttaaaaatattaaa  
taatgcttgtattcctgggataacctgacttgggtgttgcatcattta  
aacacaaattttacatgaatttgcctagggtttaggaattttgcatttat  
gattataagttagagtgatttgtgatttttatctttcatttttttgctc  
ggattttgataccaaaattatactcatagtttctaaaaagtaatcagaat  
gctttttttttttctTTTTACCTTTCTCTTCTCTGGAACATGAATAG  
AATGCTTCTGGAAATATCCTGCCCTGCCAACCTTAGCATAACAGTATC  
TATTTTGATAACTCACATATTATATAATTTTTGGAGATCTCTCTAGTTTT  
GTTATTAGTAGTAATCACTCTGATAGACCAGTGTATTCATAATAAAATAC  
AGACACTAAAGAGAAAATGGACTTTTTTTTTTTATCCCATCAAGTTCATC  
CTTAAAAAGTCCCTGTGGAttgagaagccaaggcgggtggatcccgaggt

caggagatcgagaccattctgggctaacacgggtgaaaccccgtctctacta  
aaaatacaaaaaattagctgggcgtgggtggggcgccgtgtagtcccagc  
tactcgggaggctgaggcaggagaatggtgtgaaacccgggaggcggaggt  
tgcagtgagccgagaccgcaccactgcaactccagcctgggcgacagagcg  
agactccatctaaaaaaaaaaaaaaaaagaaaaaGTCCCTGTGAAGTGTAAA  
ACTTTTACCTAATTTGACGTTTTATCTGAGGCTGTGATTTTGATTAACCT  
TATAACTTTTCTGTTACTGTAAAGAATATTAGTTTGAATTAGAAGAGTAAA  
TATTTTTGTAATGCAGCCCTAGGAGAGAGAAGAAAAACTAAGACAAAATC  
CAGCCATAGAGTTAGTCTCGGATGTCACTGGGAGAGAGGAAGCTTGTAT  
AAGAGGGCTAAGTAATCCAGGTTTTATCCTGATACATGTTCTGGCATTAT  
TAATAAGTTATGggcctggcgcagtgccatgcctgtaatcccaact  
ttgggaggccgagggcgggtggatcacttgaggtcaggagttcgagactag  
cctagccaacatggtgaaaccccatctctactaaaatacaaaaattagc  
cgggtgtggcggcgtgtgcctgtagtcccagctactcgggaggctgaggc  
acaagaatcgcttgaacctgggaagcggaggttgcagtaagccgagatcg  
tgccaccaccctccaacctgggggacagagcgagactcggctctaaaTAA  
TAATAATAATGTATCATGAATGGTGCTAAGTAAGATGTGACTTTAAATAT  
TGGAGACCAGGCTTAAGAAGTACCTTTTTCAGTAGTGACATATAAAATATA  
AAGATAACTGAGAGCTTTTTTTGTAGCCAGGAAGTGGGGACAGTAACCA  
ACTCAGTCATATAAGTTAGACATTGAATGTGTGTGGAAGACTAGACATAG  
GAAAAAGAATGGAGTATTATCTGCTGCAAAGCCAAGTGAATTTAAAAGCG  
TCCTATTGAATATTGGTGGAGGGAAATCTTGAAACCTTATAAGGCAAGGC  
AAAATAGCTAAGAATTAACCATATTGTGGTATGAATTTAAAGTCAATGAT  
ACTCTTTATTTGCCATTTCACTATTTAATTTTAAATTAATGAGCTTTT  
ATAGTTACCAGTGAAGTCTCCAATCCTATTTTTTCCCATAGAGGCTGT  
GTTCTTTATTAATTTTTCTACTGCAATGTTTTTTGGGCCCTAAATCTTTAT  
AATTATGGAGGATTTCGAATGTACAGTGGAAAAGTCATATATCTACTTCATA  
CTTTCTCTTTTGTTTTGAATTTAACTCTAATATTCTGGCAACTTACTGTTT  
TTATATGTCTTGCATTTAAATAACAGTATTAAGTCATTTAACCTTAAT  
TTTTTTTGCATAAAAAAGTACCTTTTGTGAGCTAAAACAATAAGAAAGT  
CAGTTCTGTTTTAACCTTAGATCATGAAAAAAGATTTATAATCTTTGTT  
GTCTGGGAGTATTTATAACTGTTCAAACATCATTGGTAATCTGTCTTCC  
CCACTGCCCTCTGTACATCCCAGTGTGAAGCTAGAACCACAGCTCTTACG  
GTCACATGAGAACCATTTTGTAGTGTGTGGCGAATAACATGTGCTTCTTTT  
TTTTTATTTTTAATGGATAGTAGGATTTTAGAATGTGGTACTTGATCTG  
CCATTAACAGTTTTTCTTGGAGGATGTTGAATCTGAAGTAGAAAAATAT  
TACATGGACCATTGGACCTATTAATTTGCCACTGCCCTAGGTTAATTTT  
AAAAAATTAATTTGCCAGAGATAATTTATGTTTTATAGCTTTAAAAACCA  
TGTTGCTAGTTTGAATTAATCTGCTTTATCCTGCTCCATAGCAAGCAAAG  
TGACTTGAAAAATTAATCTATATGTTTGCAGTTTTGTAGTTATTCATGA  
AGGTTTTCAATCATGAACCTCTTGGTATCCTGTCATGCGTGATAGATTT  
AGTATTAGTAAAAATGCCTTTTTTGCATATGTTTTTGCAGTTTGGATGGTC  
TGTACATGCAAGTACAAGTTTAAATTTGCCCATCTCTCCTTTCTCTCTTT  
TATTAGTGGTGAATGAATTCAGATCACCATTGTAGGCAGGTGTCTGCCA  
TATTATTACTGAGGGGAAAAGGATATTTAAAAGGTTATACTGCATCCTGAA  
TGTGGCCTTTGGGACAAAACCTGAAACATTGAACACCACAGTTTAGCCCTT  
TCATAAGTACTTCTTTTCTCATCTTCAGGATCAGAAAGGATTCCTAGTT  
AGGAAAAGGATTTTTCAGAGTTATGTGGTTCATACTCTTTAGATAGTCCA  
CATGGGAAAATGAAAATCTACTCTTAGAATGTTGTTAAGAAGACATAATT  
CTATACTTTCCCTTAGTAAACTTCCAGATTATCATGAAAAACATGCATCA  
ATTGTATCATAAAATTTGGGGAAAATGAAGATATGAGGTTAATGCTCCAGA  
CATAACTTATTTTGTGCCCTTATCTTCATTCTGTATCTGTCTTCCAAAAA  
TGCAATCCAATACAGTAATATAATGGcagttattgagctgttcatatat  
gctaggtactgttttaaatgcttttgatgtattcatttgattctggcaac  
aatcctgtaaaatagatagtggtattatttccatcttataaatgaggaaa  
caggcacgggatttaagtaattcgtgtaagtcataagacttttgagtgg  
cagggtgaaatgtaagttcaggcagtccttattcggtaacccaactctt  
aactacctgctacgttgATGCCATCCCTCCTGCTTACAATGATTTAGGA  
AGCTGTTACGGTTTTCTTATTGCCTTTGGGAGGAAGTCCAACCTTTTAAAC  
ACCTCCTCTTTGTTCTTATAAATCTGACCATAGCTTACAGTTTCGAGAGT  
ACCTCATATTCCTGTGGTACATTCCTCTCTTTCTCTCACTCTCCCTTTA  
CCCCCTTTTTTCTTTTTTTTTGGTGGTTCTAAAAGTTCTAAGTGCTATC  
TCACTTAAAGTCTTTCACACACTTTTCTGTCTGCTAGGATATTCTTATTC  
TGTTTGTGTACCCGCTTTTCTTCCCTTACCCTTTCAGGTCTGGGGAGCTTT

ACCAGACTGCAAAACCTTTTCTGTGTGCCTCTCTGCTTTCCTCCTCTGAG  
TTCTGTGAGGACATTGTTTCTATAGTGCCAAAAGTTGTTGGTACATTTTT  
TTCAAAGTATTTGCTGAATGATGACTATTTTCCAAACTAATTGCAAAACA  
GAGTTTGTGACTTTTCCCCCTACTTGTTTATACAAATATATTCATTCCAT  
GTGTGTTAAATAAAATAAACGATTATTGCTACTTCTGATATATGCAATATA  
TATATCATGCATTATGTATATTAATACATATATCCATTTTACATAGGTT  
CTATCAACATCAGTAACAAATCATCCAGTATTTCATACTACATTTTAGAT  
AGCAAAAAGCAATGACACATGAACACCTGGATTGTCTGTTCAAGATTTTA  
AAATGTAAAATCTCCAGTCATATCTTTAAAGATTTTATAAAGCATATTTT  
CCACATTATGATTTAAATCATAGGTAAAGGAATAGCGCAAGAGTACATT  
AGAAAAAAAAAAAACTGGTGAAATCTGCCAGTGTACTGTGTTGTCAAGGA  
ACAGAAAAAAATTAGAGCCTTTGAATTTTTAGGATTCAGTATAtgtatt  
agtcccttttatactgctgtgaaacacctgagactgggtaatttataag  
gaaaagagggttaattggctcatggctcccaggctatacaggaagggcc  
tcaggaaacttacagtcattgggtgggagatgaaggggaagcaggcacatct  
tacgtggctcagagcaggaggaagaggcgaggagggtgctgcagccttttaa  
TTTTATTTATTTATTATAAAttttttatttccatagggttttgggaacaag  
tggatatttgggttacacaagtaagtttttttagtgggtgatttgtgagattgt  
gggtgacccatcacccgagcagtcacacactgaacccaagtgttagtcttt  
tacccttaccaccttcccaccttttcccccttgagtcctggaagtctggt  
gtgtcattcttatgcctttgcatccccatagcttagcttccacttatgaa  
tgagaacatacaatgtttgattttccctcctgagttacgtcacctagaat  
aatagtcctccagtcacatccagggtgctgtgaatgccattagttcattca  
tttttatggctgagtggtattctattgtatatatacaccacagtttcttt  
atccactcattgattgatgggcatttgggttgggtccacatttttgcagt  
tgcaaatgtgctgctataaacaatgcatgtgcatgtatcttttcatatc  
atgacttcttttctctgggtagacacccagtagtgggattgctggatca  
aatggtagctctacttttagttctttaaggaatctccactgtttccata  
gtgggtgtactagtttacatttccaccaacagtgtagaaggttccctgt  
ttaccacatctatgccaacatctgttatttttttattttttaattatgcc  
cattcttgcaggagtaagggtggtatcaatatggttttgatttgcattttc  
ctggctcatttagtctaacccttttaacaaccagatctggtgaggactc  
aatcactatcacaagaacagcaaggaggaaatccgccccatgatccagt  
cacttcccaccaggccccacctccagcattgggaattataatttgacatg  
agatttggggggggacacaaatagaaaccttatcaGTATAGGTAAAGTAT  
ATTATCTACATATAATCATTTTCAATTCAGTGAATTCGCGACTGTCCGTT  
GATAAGGCATTTAAAGAAGTACTGCTCGAAAGTGGTACATGTAAAAGATA  
TTAATATACTGTCGTGACTAGATGTAAATTCAGCAGTTAAGATCTCGAC  
ATTTTCATATATTTCCAAAATAGTTTTAAATATTTTGGTGTTCATTGACC  
CATGTCATTTAGCTAGTAGACACATGTGCCTTTCCATTTTACAGCAACA  
TACGCTTTGTGCTGTGAATGTTTCATTGCTTTATATCTGATTTTTCATTG  
GTTTTTCATACTGTGTTTGGTTTCTACACATGAGCACACAGTGCCTAGAA  
GGTTTGATAGAAAGCTTTCTTCCATCAGTTGCATCCATTTAGTAATCAT  
GTTGCTTATTCCCTACACGGCCCTTAAACAGTTAACCACCATATTCAGT  
TTCTAGTCCTGGGATCAAGGCCATTTAAATCTTATCTTCTATTTACCTC  
ATTACTTGTTTGGGTTTATACTTTATCAGTTTGTATACCTGTTTGTGAAT  
GAACGTTTATCCTCAGTAGGATTATAGGCAAGGACAGTGTTTTCTAAGT  
CTTATGTGTCCCTCCAAAACACCTAGTTTGGTAAACTTTAGGttaaatc  
atgctagaaaagagagaatttactatatttaagtgtatttagaaaagcc  
attttataagcttccccagtaaccatttctaataAATATCAAATCAAGTT  
ATTGATGTCTGTTTTGAGTCCATGATGTAGTAAATCTAAAAAAGAGTCTT  
CTTCCCTTGTATAGTGATGAAGAATAATGTATTTATCACTGACTTCTCTA  
TTTAGTAATAAGTCATGTTAATAGTTCCTGAGATACATTTCAACATAACT  
TTTCCCTGTATGTAGTACCTATTAGTTTTACAATGGGAATAAAATCCACCT  
CTGTGTATTTAAATTGATTTTTCACACTAATTCTCTAACTAAAGTGTTA  
GTCTGTTAAATAACATCAGTGGGAAGAAAGCACACATTATTGTGCCAAA  
TAATAAGAANAATTACACATCCCCATCTTCTCTTGCTATGGTCTTTGAA  
CGTCCCACATGTAAACTTACATCTACTTCCAAATTTAATGGTTCATGAC  
AAAGCAGAAGCAACATGACTGGATTTAATAGGCTCTATTTCCCATGATGC  
AGGACTGAGGTAAACTGATTATCTTTCCATCTGTAGCACTTGTAATGTGC  
CATTAGTTCATTAGCGTTACAGGAGGGCTAAGAGTTTAGTGAATTGTGT  
GTGAGCAGAAGCCATCCATAATCCAAGCAGAGAAACCACATGTTTTAAGA  
CCATATGACATAGTAAGCTTTGTATAGTAAGGATCCTAAATGTAATTTGG  
AACTCTGGTAGTCACTTTGTAAAATCATCTTACTGGCTTAGACCATGTTT

TACTGGCTGATTTTTGGTTTATATTCCTCCCTAGCTGATGGTGGTACTTT  
GAGAAGCACTTGAACAGTTTTTCATGTTGTCATCATGCACTTTTTTTCAA  
ATATGTGTAATAACTATGCTAATGTGATTGAGTTGCTGTGCATTAAG  
TGCACCTGATTGGGCTCTTAGATTTTTATTTTTTTGAGGTGTAAGGTCTAT  
GTTTGTCTCTGTCAAAAAGTCCCTAGTGTATGCATGGAtttttttttct  
cattttttcttttttggttgaaacagtatctcttgctcaggctggagtac  
catggtgcaatcatggctATGCAGTTATGATTTTTTTTTTTGGATGGCAT  
ATAATGTGGCCATTATATGTTGTTGTTGTTTATTTCATTTTTGCAC  
TTGGTGGTTTAAACCTAGAACATTGGTTCTTCAACTCAGATTTCTATTT  
TTTGATTGTCATATGTATAGCATATGTGGGTGAGGAGATTGTGTAGTTGG  
TATATGAGCATAATAATTTAGAGAATGAATTAGGAAGTATCAAGAATAGT  
GGATGAGTTTTCTTTAAAATACCCTGAGATTGTCTGCTGTAAATGTATAC  
TGTGACATGTGTCACCTTTGTTTTAAATTATAAAGCTGAAATGCAATCCGC  
TGTATTATATCTTGGCTGGAGAAAGACTGTTGCCAGAGGAAGGTTGTTGG  
ACTTGGACATAAAGAAGAGTCAAGATACAACTTGTGAGTGTACCCAG  
GACTGTCCAAAGAAGAAAGCAATTGGACCTGATAGTCACGAATTGCAGTC  
ATTAGAGAAACATTTGCTGTGGTTCATTTcttattctaatacattagctt  
tcttttcccactctgccatcaaaacagttttccaaggtcattagtgac  
cttgtctgtgaactcagtagatgcttatatccctcatctacatgatctct  
ctctgcagcatcaaaagggaattgGCATTTTTCTACCTTTCACTTCCCCTA  
ATGTTTCTCTCTGTTTCTCCAGATCTTTTTCTATACATTTGATACAAT  
TTACAGAATTAGTATTATACCATGTTTATAACTTCATGTCCCATTTACTG  
CATTGGATTTTACATGGACTTCTGTGGCCATTATATGAATATAGCATAA  
TCTTTAAAAAAAACATAGAAGACTATAAAGAATTGCTCATTTTTGAAAAC  
TTCTTGCCATGGTATAGTGTATTTAAATCATATTCTGAAACCATATGTAA  
GGAAACAGAATAGTAGACAGAAGTCCTTAGTTTTAACAAGTTACTTATA  
ATTGAAAGACTTTAGGCTGGGCAATATTTAATTTCAAGTAAATGAACAA  
GGAGAAatgaccttagttaagccattggaacttgttcttctctcttttt  
tttcttatcttgaacaggatcaaaactgggatctctaaaatctctccagc  
gtaacattctgtgacttgtgaATTAGTACATGCTGAGAAGTTGTATCTC  
TCTGAGCCATAATACTTTGTTCTGCGATGGTTGTGATTATTATAGGTTAT  
TGTATGCACACATGTTTAAATTAATTTTTAAAGTACCCTGTAACTATAT  
TATTAAGTGTGTTATGTGGCATAATTTTCTTCTAGTAGAACAAAAT  
CCCTGTCTGTGAATTTATCTAATTTTTTATTGGTTTATAAAGACTATAT  
GGCCTATAATAGCTATAGTAAATGATTTTTATTGGCATTGAAAGTCTGT  
CACTTATAGTGATTGGTGATTATGAAGCCATATTTAATATGAATAAGAA  
TGCAGAATACAGTTGTGAAAAATTCATAATACTATATTCAGTAAAAACAA  
TCCCTATAATCTGATGTCAAAGTAAATTTACATCATTCTCCTTTGAG  
TTCAGCAGCTTTTGAATTTAGATTCTTCTGCCTAATATGAGTTCTGAGTA  
ATTTATTTAGTAAATTTGATATTTATTAAGGATGTTGAAAAATTGAGT  
CGAGTCACACATTTGACTTACTTAAACACATCTGCACTTATTTTACCAGT  
AATATATTTGGTCTGCGGCCTGTGCGATTATACAGATGATGAAAGTATGAA  
ATCGCTATTGCTGCTACCACTGCTCAGTATGTAAGTATGGATTTAGCTTTGGGACatttatatattttatta  
aaattGGTTATGAAAGGAACATAATAGAAAAATTTCCATTTGACCAATTG  
CTTAcattcaccaacaattattgagcacttctctgagtattagctactgt  
gGATTCAAAGACATAATCACAGTACGACCATCTAGaaatacttattgagc  
ccactctgtattttaggcagcattcataaaacaatgaatatgactggtag  
aactcttattctcagggaggagcttaccatctggtgagaggtaggaaaga  
gacaaactgtaaatattgaactaatataaataaaataatttcagacactt  
agacatgagtgtttcgaagatggttagagtgctcggtgggtggaggtagt  
gggcttctgcaaggccattgctttagctagggtcacagagtgaggcctta  
aagcactgatttgaattgaagcctgaatggtgaagtgaggaggctgccag  
gtgactatctggaggacacagtgatagggccttcagtgaatgaggctgg  
tatggtggaaggttagaaagaagtttgttattgctggagactagcgagcA  
TCAAaacgggactttcggatagattacatatgaagtgtgggaaaagaatg  
gaataagtatgacctagcagggaaatagatggtaatgccatttgttggc  
atggagaaggaaatcaatagttctatgtgccaatttgatgtctgtaaac  
atgaaatggagatatcgaatagataattggatatgaaagtctggagctta  
ggagagaggtacaagctagagataAAGTGGAAAGAATGCCTGTTTCTTAG  
GAACCCATAGCTTAGCAGGGATTTAGATATAAAAACTTTTACTGTACAT  
TGTAATAAATTTGTAATAAAGCTATAAAAAATATACAGTAGAATCAAAGT  
AAGTAGAACTACAGGAGATGTCAGGAAAAATTTACAGAAAggccaggt  
gcagtggtcgcacctgtaatcccagcactttgggaggctggggcggtg

exon 7  
BARD1\_e07





TAATGCCTGTGATTAAGGAACTTGATGTTAATTTTCCTTACCTCTGGTTAG  
TCACTGCATTTTTGGAAAAGCTTCTggctgggctgggctgggctcaagcctgt  
aatcccagcactttgggagggcccaggtgggcggtatcacaaggccaggaga  
tcgagatcatcctggctaacacgggtgaagccctgtctctactaaaatac  
aaaaaaattagccgggctgggtggcgggctgtagtcccagctacttg  
ggaggctaaggcaggagaatggcgtgaacctgggaggtggagcttgcagt  
gagccaagatggtgccactgcactccagcctgggcaacagaatgagactc  
tgtctcaaaaaaagaaaaaagaaaaGCTTCTCATATTTATGGTGTCA  
TTTAGATGTCCTTAGTAAATGTATATACATATGTTCTGGTTTTAAAGTCT  
TTTTTCTTACAATACCAACTATTTCAATGAAAAGTAAATGGAGTACATAG  
TATACTTTTAAGCCTAAGCGATTCATGTTACTGTTAAATGATATATTGAA  
TTTAATAACACATGTTTTAAATATACTGCATGACATGTCTGTGAAATGAA  
AGCAATTTATTGCTTTTCTTTTATGATTACCTGCATAACACCCTTTTGGT  
CTTAGTTAATTTAATCCAGTATTTTTAGGAAGCTGTTGGGAAATTGACTG  
CCTTTTACTACTTTAGTTGGAGTCACTATAACCAGCTATCTCAACCTCCAC  
TGAAAATGTATACCTGTTCCCTCTTCTTGCTGATAGTCAACCCACCATC  
ACCTTCAGAGCTGCCTGTCACTTCCCTGCTGTCACTCATTTACATTTCT  
ACTTGGATTCTCTTGGGACTTAAAATGAAAAGAAAGCTCATACACGATTA  
TTTTCTACTCCTTAATAGTTAACATATCTACTTTTGATACTATGGCTAAC  
ATAGAACAGTGGATTGACCTTTTTTTGTTTATTAATTGTTTACAAAAGAT  
TAGTAGTTACAAAAGATTAGTGGTTACAGAGGAGGAATGTGGGGAGCAAT  
acagttgctgatccttgatggttagtggcctgtaacacaagactacct  
gagataaaattatgcaacaagtgcatttataaccagtgaaatcaggcca  
ggcacggtagctcatgctgtaatccttagcactttgggagaccgaggcag  
cgagaccagccaggccaactggcaaacccccctctgtactaaaaataga  
aaaatgagcaggcgtggggcactgcaatcccagccacttggga  
ggctgaggcaggagaatcacttgaccccgagggtggaggttgcaagtggag  
ccgagatggcgccactgcactccagcctgggcaacagagtgaaactccat  
ctcaaaaaaaataaataactagtgaatctgaataagctctatggatcg  
tattgaactcaatgttggtattatggtatagcgggtgtagatgtaac  
attggacactgaaggaaaagtaagtgggacatctctgtacattcctttga  
aacttcctgtgactataattatTTTTAAATAAGATGTTAAGAAAGAACAG  
TGGGTATATTTATTGAAACTCTTTATGAAGCAACTGATGGATTAAAATTA  
GTTTATAAAAATGGTTTTATGGCTTTGTGCTTTGAAGGTTTTATGGTAGA  
ATGCCTGATTTATCAAGATCTTAATTATGTTATTAATTTAATCTGTAGTT  
AGAAGTTGATTTGGTTTGTAAAACAGTTTCTTTTCATCAATTGGTATTCA  
TGTCATTTTCAAATACAGCTACCCTTCTTTTTTTGTGATGCTTGTCTCA  
ACCAATGCAGTCTGATCCAGCTAAGAGGCTGTGACTAGCAATGCCACTCC  
ATCTGTTCTCATCAATCCCTATTAATTAGTCCCTCCTAGTTATGATGAGT  
TTGAGAAGTAAAGTAAATGGACTAATTTGTCTCACTTAGTTTTGAACTT  
TCTTTTTCTTTTAAATCTGTGAAAGTCTTATTGACCTCAGTGTTTAAA  
AAATTCATTTAAAATGGTTTTATGATTAGGGATGCTTTTGTATCAAACCT  
GTGCCAGAAACCTTTCCAGTGGTTATAAGGAGAAATAGATTTTCATCATA  
GTAAGGTGCAGTAATAAAGAAGCCATACGAAATTTTGAATGTTAAGACA  
TTTACCCTTAACTTTTGGAGTCTAGTTCTTGTGAATATGCTGAAGTGGCA  
TTTGGTTACATATACAGGCTACATGATTTATTTCCATAAAAATATGCCTTC  
TTTGGGAAATGTGGTTTTTGTCACTTTAATATCTTGGCCGTGTCGTTTTT  
ATAGAACCCTGATGGACTCGGACTAACTTAATAGTGTGCTATTTGGTGA  
TTCTGACAGTAGTGAATAACATCCTCTAATATCAATGGTTCTTTTAGGAT  
AAAGGATGGATGGAATCCCTTACTGAAGTTCATATCGTCATATTTTCTAA  
TATAGAGTACAAAGAGAAACAGATTCAAAGTTTGGAGATACTTCTTTAAA  
TAGTCACTGGGTTTACAAAAGAAGGCAAGAACCTTCAAATAGTTCTTTTC  
CTAATATATATTTCTCATAGTTTCTATACTGTTCTCAGTGTCAAGCATCT  
CAGTTTGATTCTTTGTTTGTTTTTTAAAGAGATGAGGTGTCAActcaagcaa  
tcctccagcttcagccttctgagtagctggtactacgggtgcacatcact  
gcacctggcTCAGTTTGATTTTTAAAATGTTTCAGAGCTATTTAAAACCT  
ATTTGAAAACCATATATTAAGATGATAGGTGGACCAAAGCTTTCAA  
AATTAATTTAAAGATTTATGACTTTTTAAAACCTAGTCTCATGTTTGGAG  
TCTGTCCATTAACCTTGTGGTAGACAAAACCTCAGGATTAACATTTAGGA  
AACTTTTCATATTAACCTTTTCATGGGATTTCTCATAAACCAAATAGATTCA  
AGTAGAATTTTATTTGTAATTTTCTCTATAGATAATCAACACATTTTATA  
AACTAAACCATTTAACAAAAGAATTAACAAAAGATTTGGATCCATTGG  
GTCCAAATTTAACTATGAGAAGTTTTCTGTTGAAGTGTCTGTCTTAAT  
GGTTAATATCTCTTATTTTCTACATTTGTTTATACAGAGTATCTTACAGT



GCCATAATTAATGAACTTAGCATGAGGATTCTGAGACTAAGCCATAATTT  
TACAGACCATCCAGTCTATCTTATATTTCTTTTACAGATATTTTACAGAA  
TGATACTTATTTTATATTTTACAGAAATAGGAGCTATAGATAAGAAAAGT  
CCCTCCTTCAACATCAAAATGGTGAGGGGAGACTCTACTTTAGTCCTAGTC  
TGGGTGCTAATTTCTCACAGGCCATTAGCACCACCCTCATACAAGGTTGA  
TTTTGGCATTAAAGAGGTTGATAAGAATGAAAGAATAGAAGGTATATAAAT  
AAGTCATCTTACGAATCTCATAGAGTATGAATAAGATGAAACTGTATCCT  
AAAGATGCAAACCTAGGCCAAGATAAAAATGTTTTCTACTGACCTATTCTTT  
TAGTACACTGCTTTCAAATTTTTTTGTATCTTAGCCTTTTTTTTCTAAAA  
TAaatttaattctacatcttcttttcttatctcattatgaaggggagaac  
agatggctgtcatcttttctttaataatcttccCTCTTCCCCACTCTCA  
TCTAAGTTTAAATAAAAATTGCAGCTGTAGAAGTTGTAAAATTCCCAGTA  
CCTAAGGGAATTACTGAAGGAATGTGCCAGACATTTTACACTGGATTTAT  
GTCTGTGAGATGGGAAGGGCTAAATTGAGTGTTTTTTCATTTTTGTTTT  
AGCTGAGGAGAGATGGACCCTAGAAGACAATCATTACATCATCTTAAT  
AAATAACCTCATAATCAGGCTAACACATTAATTCTTTTTCAAACAAATCT  
AACAAGTTGGCTTCTTTAAATGGATACTGAGAGTACTATGGAATTTTAAA  
ATTAAATGCAACTTTTTATTCTATACAGACTTTGCTAATTAATTTTTAAAA  
AACATTCGTATAAATTAAGATTGATTAGGCAACTTTATGCTGACAGAAGG  
CTTCCACCAAAGATTGTCTAAGAATAAAAaaaaataacatcctttgatct  
aatagtcccagttctgagaatttaccctacgcaagaatacagatgaaag  
aaaaagtatttgcagtgttacttctaacagcaagaagtagagaatataac  
ctacatatgaaagattaggaaaatTCTGAAATGCCTGAAGATACTCTCTG  
GAAAAAATGCATATTTTTTAATATGATAAATATTAAGACTAAAAGATTATG  
AAAAATGAATTGTTTTAAATTTTAAACACATCAAAATTATATCTTCACTT  
TCAACAATATATAAATGTATGCATGCATGTGGGTAAAAAATAATCAAAG  
AGCAGTAAATTGGTGGGTTACTGAAGAGGACTATTTGTTTTATAACAGTTT  
TAAAAATAGTGTGTGCCTGTTAGATCAAATTTAAGTTCTCTAGGAATAAA  
TTAATACGTTGAAATTTTTCAAGTTGTAATAATAATTGGAAGTATTTTAC  
TTTTCTAACGATTAATTGGATAGGGAAAGGGCTTTGGTCTTAATTAGGGAA  
ATTAGAACCTGCATGTATTTATTCCTCCCATCTGATAACAACAGGTCTTTT  
ATACCTGTTTTAATGGATACCCAGCAAATACATTTGAATATGGTGATTGTC  
CTAATCAGAACAGAATTTTTTACATAAAAATTTGAACTTTTAATATATGA  
CTTCAAAGAACACTGAGCATGAGTTTTCTAATAATTAGGAGAATTTTTG  
GACGTTAGACTGTGTTCCGGTTTTTAAACCATACCTATATAGAGACAGACAA  
TTTTGATATTATTCATAATACAAGAGATAGACTATTTTTGATATTTTGATA  
TTATTATGCATAATACAAGGTCTTAGAATTGATACCCAAGTTTTGTCTAA  
GaaaaatztatgatataataatataatTTTTGCAATAGAATTTAACCTGCT  
TCTCAATGCATTAAGTAAAATAGCAAATTACACATCTTGTAATGTGAAGA  
AATATATTTCTACATATAAATATGCTGATAGCCAGAATTTTTACTAAAAT  
GTCAAAATAAATAAATGCTAAATGATATTTATATGGAGCCAGAATTTAA  
TGACTGTGCAGAGTATTTAATGAGATATCTCAAATCTTAAATGGAAACAT  
TTAGCCTTTATTTTTATTTTTTACGCTTTATTTTATTGTCCTTTCACTTT  
TCGCTATGGAAGTTTCAAATTTCAAACCTCATTTCTCTGTTCTTTACTTA  
AGTTTTCCAAAATTTGCAGTGATAGTATGCTACTGTTTTTTTCATTTTTGT  
CATTGTTGTAGGCTGCCTATTGTGATGTCCTTTTTACTAAAAGTTTAGTG  
CTGTTATAGTTTACTCGACTAAAAGTCTAAAATATAATCATTGCAAAA  
CACTTGTTTTGCTTTTACAATCTGGGTGTTGATTTTTAATAGAATCAAAG  
GAAATCTTTAATTTTTTATTTTTACTTACATACTGTTATCTTGAGTGACAC  
ACATCCCTAATTTAAACATCTTTAGTTTAGATCTAATGACATACTGTAGT  
AGAACATTTGTTTTCATATAGAATAGTGATGTTTGATTCTGtattttaat  
tttttttttttaGGATATTTTGTATTGACTAAAAGTGGTTAATTCTGATT  
CCCATAGCTATTTTCAAGTTACAAATAGCCATTAATTCCAGAATAATAACAA  
CCCTTTTTTCCCCTCCctcactctgtcacacaggctggactgcagtggtg  
caatcatagctctttgcagccatgaactcctgggttcaagtgatcctcct  
gcttcagcctcctgagtagctggaactacaggcactcaccacatgcctg  
gctaatttttttttcttttttagttgaggcagagatctcactttgttgcc  
caggctgttcttgaactcctgtttcaagcggctctcctgcttcaccctc  
ccagagtgtctagcattacaagtgcgagccaccaggtctggccTAAAAAT  
CTTTAAAATGTGGATCTGTTTACTACTCTGGGATTTGAAGAGTGAGAAAA  
TTCTAAGTATGGCTTCCATGCAGAGTTAATAATCGTCTCCTCCTTTGGA  
CATTTAACAGATCTCCATTTTGAAGTTTTCTTCCATCTTCATTGTATTCT  
CTCATATTTTTGTATAACTGTGGATTGAGAACACCCCTCCTTTTTTTA  
ATTTCTTGCATTTGTGTTATCTTTTTTTTATTATAGGAAAATGTAAGCTTA

ATATAAAACCATGACCATCATCAGTGGTCCATGCAGCTAAAAACAGAAATA  
TACATCTACTGATGTATATGCTTTTATGAGGTAGGAGGAGAGAGTGGTTA  
TTAGCAATTTAGAAATAAAAAATACCTTCTGTACAGTACAAGTTTCTTTA  
TAGAAAAGTGTGTAGCCCTGGAATTCATAAGCGTCATTATTATGCAAAA  
ATTCCAGGCTTTGCTAAGGTAGACAGAGCTACCTTAATGACTTTGGGTTA  
ATCAGTACTTTAGAAATGGGGCTGCTTACCTATATGTAAAAAATTAATAA  
GATCTCAGGAAAAAAGGAAAGCTTACATGAAATGGAGAACATGATCAGGA  
ATACACCTGGGCTAAAAGAATCTCTAGTTGTAATAGCTAAGTAGTTCATC  
CGTTTGTCTGCGAAGTGATAGCTTCAGTCAAAAACCTTCAACTATAAAG  
GAACATATGAAAAGTAACAAAGATGAAATAAAGCATAACATTTTATAAGGT  
TAGTGGCTTGACACATTTTCAAGTATGTATCATTCTGGCATATGCAAAAAG  
TTATGTTTACGTAACTTACTCATGCAAGGTAATTTTAGTAAGGAAATTA  
TTAGCCAAGAAAGCTAACTAAAATGTGGTCTTATATTTGTATTTTGTCTT  
TTTTTTTCTTCAAAGGAAGTAGAAGAGTTCATCTTTCTACTAACTGAT  
GGAATAATTATGGACTTTATTAAGTGTATTACAAATATAAAATAGTTT  
AAATCTTAAAATGTAAGTGTGTTTTAAATGGAAAATAGGTTAAGAATTCT  
TGCTGCAGATTGCTTAACTTTTATTAGTAAATAAAACCTTAAAATGTTA  
GTCATTATTTAGGCTTGGGTTAATTAAGTAATGTTTGGCTGGTAGATTCT  
TCCAGTGCATTGATAATGTATCACCATTTGAATTGCTGAAAGTTTATTTT  
AAAGCATTTCATTCTTATTTACTTTTTCAGTAAATCAACTCAATTGATTTG  
TCTTAAAAAAGGTTTCAGTAGGAAGTTGATATGAATTTGTAAGTGTGGTA  
TTGTCTCCGGAGTAGGTTCATCTTCTGAAACTCACAGTTTCAGATAACAA  
GTTAGACAGTGGCAACCTTAGCATGTCCGATTGAGTAAGCACATTGATCC  
AACTAAAAATAAAGATGAACAAAAAACTTGATCTGTGACATGGaggata  
tttcagttctcatctcagttatgtcactgagaaagccacttaaactctctt  
ggga<sup>c</sup>tttaagtttccttatctataaaagaggttgattagaCAAAGCATCA  
AAAGTTTCAAATCGGCAGGCTGAGGACTCTGAGGGCTGAAGGAAATACAG  
TGTCTGGTTTTGTCTAACataattaatTTTTatataTTaGGCATGATGT  
TTGTTACAGtctccatagcttccctaccacctcacaccaggttcttcacac  
atTTatgtaactctacctggctTTTTgtaggcatttgagtcgcaatccttgA  
AGTAGTTGTCCTCCAGCTTTGAAAAAATCTAGAGATTTTCTATGCTA  
TAACAGCAACTTTAACAAAACACTTTGCCACCCTTCAAATGTAGTTGTAG  
ACCTGGAACATCCTTTCTTTTCAGGAAAAGAAAAAGAGCTACTTTCATT  
CTTCCTTAGTTAGTCTTAGGTGACACAGGATTCTGCAAATGTTGCTTG<sup>G</sup>  
AGTAAAAGCATATTAGAGAAATGTATTTGTTTAACTCAATCATTGTAAGT  
AGAGCATTGGATTTGCTTTACTTTACAGAACTTACTACATAACTCCCAT  
GAAACAGAATATTTAATGAATTAAGACTTACACTGGCTCCTTCTCATGGA  
AGTACCATGCTGCTCTGTTGGTATCTGCCATCTCATTTTTTTGTAGCCAT  
ACTTACTGGACTGTAGTATCTATTAAGGTAAATTTCTGTTGATTGACTAA  
TGCCAGCATGTTTTTCAGGAGGAATAGATGCCATTTTAAATGTGTTTCTGT  
AAATAATCAGTCAAATAAACCCATAAAAATGGAGAAGCAGCTGGCACAAGC  
ACAGCCTACTTAATTCTGCAATTAGACATTAGCCATTCATTTCGATACAGT  
AGATATCATAAGAATGTTTCAGTCCTTGGCTTTCTGTGCCACCATATGCAG  
TTAAAGATACAATTATGAATACTCTGTAAGTACCATTGGGAAGGAGATTT  
GGGAAGGGGAATACCTGCTTACGTAATGAGGAAAATAAAAAAATCACATA  
TAAAATAGTGAATTTGAGTTAACCATTTCACTGGATTCTGATGGTTTTTT  
TATTTGATTTTTAATATAGAA<sup>A</sup>CAATATATGACATAATTCCAGCACACTG  
GCAGTGCTTCTAGTATGGTATTTT<sup>G</sup>ACCCAGTCAAGAATTTT<sup>G</sup>AGTCTCA  
TTTTCAATGtataataaaattaatatttatattaCCTTTATTAGAAAGGT  
TTTTAATTCAGT<sup>G</sup>AGTGGTTATTTAAATTTATGCCTTTTTT<sup>T</sup>AGAGTATAA  
TTTTTATTATATGTAACAATTTTCA<sup>A</sup>AGCACATTTATGATAATTTAAAA  
TTATAAGATTC<sup>G</sup>GAAATTCAGCTTAGCAACCTTGGGTGAATATGACTTTC  
ATATTAAAAAAATGGGGGAGAGAGATCTGAGAGCCAAATAAAACACAGAT  
AAAACATACAAATTAAGATTGACATGATGGGTAATCAT<sup>A</sup>GAC<sup>C</sup>GTCTGAG  
TGTGAGTGTGAAATTTGAATTTGCATTAATGACCCAATTCAGGAAAGACT  
CAGCGTCTTGACAAACCTCTGCTTTTGGAGAGATGGAGTATT<sup>C</sup>AGTTGTT  
AGTCTTCTGACCTTTTATAATAAACAACATCTTAGAACACTCAATTTAA  
GCAGCTTTTAAAGCATTTCACATATTCACATCATGCTAAGATAAATACCCAA  
GGTTTATCTTGTGTACCATAAGTTATATTTcagtgagaatacacagcc  
tttagaaaactaagcagat<sup>t</sup>taggttcaaattccattctgccacttaat  
ggctgcattcagctttaagcaagttgacttcttagcatttcagttccctc  
ccctgaattggaagtaataaa<sup>c</sup>agtaaatcctcattg<sup>t</sup>ttgtggattctg  
tg<sup>t</sup>ttgtgag<sup>t</sup>tttcttacttgctaaaat<sup>t</sup>tttcttgtaatccccaaatc  
aatactcacagtgct<sup>t</sup>ttgtagacatgtacagagtagtgaagaactttag

ttgacaaacaagtggtgtccccagctgaggtcaaacaaggtgatactttac  
ctcctcttttcagctctcacgctgtaaacaagtgccctttcacagctctg  
ttgatgccatgtttttgcatttttgtgtttttgttctgattttattat  
ttaaagtggcctcataatacagtgctgaagtgctgtttgtgagtctaag  
ctcaagaagatggtgatgtgcctttcagggaaaatattaatactgtgta  
ggataagctttgttaaggccttaattgtagtactgctggcctaagttaa  
atcttaatgagtcacacagtatacaataaataatgtgtataaacagaaaca  
tacataaaacaaagttaagtattgatcagttgatggaaatgctggagcca  
caggccacagaaatgtaaccctgtatttcctttaacagcagtgttcat  
tattcactaatcggtgttcatagcatctttatagaacataactactgtag  
ataatgagcattgactataactactcttctgctggatttggggaaggatACAA  
GTACTTTTTGGTAGCTGTTATCACAGTAATTTTGATCAGGATCTTTTCTTA  
GAACAAACAGTTGTGTCTTGGTCATTTAAAGTTAGAAAAGTAAAAAGAA  
AACAGAATAGAATAAATTGGTATTTTAAGAATTTTCTTTTTCTCTTTGA  
CCAGAAAATATTGGTGTGTGATTTTTAGCATTGGATTGGTTAGGCCTTAT  
GATTTATGAGTATTTTTATTCTAGATTGTGGAAAAATTAAGTTTTTCAGAG  
CACTGCACAATGTACACGTTCAATCTATAGTAAAGTATTTTGCTCATTGG  
ATGAATATTAGGTAACATAGCATTTCATAGTTTTTATAAAAATGATACTGCT  
CTCATGGTTCTCTATTAATTTATAAGAAGAGAGTTCTGTCTGATAGTATT  
TACAGGTGTAATAAACTTATATACAATCAAATAAATTTCTACTCAGGTT  
CTACTCAATTTAAACCCAGAGAAGTAACAATGGAACAACCTTATCCATAT  
TTTTCTTAATGATGTTCTACTTTTTCTTTCCATATTTAATATTGTGATTC  
GTATTTGTTTTAACAAGAGCTATAAATGGCTAAAACCTCTGGCTGTGTATTA  
TTTTCTGCTTTTATTAGTATTTTTGAATACCCTTCACTAATACATGTAAA  
TCATTAATACTTCCAGCatttttttaataatataaaatattGGTCCT  
CCATTATTTTTCAGAAACAACCTTGCATTCAAACATTTTATTCAAAAAACC  
TATTATCTTTGCTTTTTAACATTGAAATACATGCAAAAATATAAAAAGAATAT  
TTTATTATCTTTCTGGCAAGCAAATCTGCTCCACATTTGTTATTCTTTG  
AAAGGTTAGCCATTTTAAGTAGGAAAAGAGGGAAAAGCTGAATCTGAAAA  
ACGAATCTTCTCATGTTTGTCTATGTATAAGCTATTAACCTTTTTTCTTT  
CACTGACTTTGTAACAGAAGTTTACGTAATGTGAAGTTCTTAGGATTTCT  
GGACAAGAGTAGGGAGTTTTCTTGTATTAGATATAACCATGATTGAGATT  
ATCTCAGTGGCATCCTTAATATCTTTAAAACATGGATGTAATTTTAAATG  
TGCTTGAAAAATTAATTTGATAGTGGATTGCTTGTGACAGAGGAAAAAT  
AAAGCAATAAAATTTCAATTTAAAATTAAGCACTCTGAGATAGAGCATACA  
ATATTAATGAAAGTTTCAAGGATTAGATTATTGAAATAAAGTGACAGGAAAC  
AGCAGGAATTTTCTTCTTAGGGAAGAGATTATGACTTCTTGTACATGA  
TAGGTGTTTAAACacagtttgagcattcctaactctgaaaatccaaaatgct  
gtaaaataactaaactatgtgagtgccagcacaacacacaagacctaact  
gatggctcacagctcaaacgcagacacaactttatgcacaaaattattaa  
agatagatataaaaatctctcatatagctttatctgtataaagcgtat  
tatgaaacataaaatgaatctcttttttagacttgggtcttgttccaaga  
tatacctaattatgtacgtgcaaatattccaaaatccaaaacaaaattga  
attttaaaacacttgtgggttcaaacacttcagataagggatacttggcc  
tATAAATATGATATaggaagagcgccgaagtgggaagtctgttctttagg  
aagtggttcactttaactttgctattagtgatcttagcaagtcactttat  
gtttctgcacttgactgtgcagatctttaaaacaagaaggtaggactagc  
tcttcagggctctttctacctcgtaagttatgtgattctaGGTATTTTCA  
AAATTCAGTTTACAAAGATTAGAATAAATAAACAATTTTATAAAGAGGACT  
CAAACACATTTTTTTTTCCCTCAGAAAGTACCAGTTTTTTTTCAGTTCTGTCTG  
CTTACTCCAAATTTCTGCAGATGTGGCTCCTGGAAACAGTTGAAGTTTTGT  
TATTGTGTCAAGTGTGGGGTAATAAAGAAGAAAGTTTTAAAACCGATTATGC  
CATAAAGTCTGAGTTAGTCTAAAGTGGACCATTACTCACTCTTGGAAAAC  
ATTGCATTTCTTTTTCTTCTCCAGTATAAGTTTTTTGCTCTCAAGATAATC  
ATTATAGGTCagcaaggtgtggtggttcacgcctgtaatcccagcacttt  
gggaggctgagggtgtgcagatcacgaggtcaggagatcgagaccatcctg  
gctaacgcgatgaaagcctgtctctactaaaagtacaaaaaattagccag  
acatggtggcgggcccgtgtagtcccagctacttgggaggctgaggcagg  
agaaaggtgtgaaccaggagggcggagcttgcagtgagccgagattgcgc  
cactgcgccccaacctgggtgacagtgcaagactctgtctcagaaaaaaa  
aaaaaaagaaaaaaaTCAATCATAGGTCAAAAAGACATTTTACTCATACA  
CAACTGAATCTTAATTTATATTAGATGCAATCGCAGGACAGTTCTGGGTA  
GCAGATTAAGTGTGGTTCTTAGCCACCCTTTAGTCAAGAAAGGAGCCCT  
TTTGAGGCATATGCAGTTTACATGCCGAGTAGTGGTTCTGCTCCTGTGT

TGGAATCAATTTACTGTTGAAGTAAGTAGGGATCAGCTGGACAAAACTTT  
ATCACTAGCATTTTTTCAAGAGGTTTCCAAAACACTGTAGTATATCCAACA  
TATATGTCTAATCCTCAATATAAAGTATATGTTTATGCAGCCATAGATTT  
TTTTCTGATCATTTTTAAGCCATTAGATATCAAGTGATAACAGGATGTAAC  
AGTTTTGATTTCAAAAACATGTGTAACCTGAACTCTTACAGGTGCTATA  
TAATTACTATTTTTATTGATGTGGATAACAATCTGTCAATGCTGTGTCCA  
TAGTGAATTTTTAAAAAAGCTTTTGTTCCTTTATGTTAACAACACTAGACAG  
TGAAGGGGATACCTGAGTTATTGTTCCAACCTTTCCCGATACCCTCTGCTA  
TTAAACTCCTGTTCTATGGGAAAGTGTATGAAATTCTGAAGAACGCATAG  
GTGAATAATATATGGTTCCCTACCCTCAGTGATAAAAATGAAGTATTGAGCA  
AAACAACCTCAAAGACAAATAGGAAATTGTATGGAGGGTTGTTTTTATG  
ATGAAGATAAATTCATTGTAGTATCTAGTTTTTAGAATGCTTCTTGCATTT  
TATCCACAGAAGCCCGGTGAAAAACATTGTTTTTCATTTTTTATTTCCATA  
GGCAAGGAAGCTTCCAGAACAAGTAATTGGGATAGCCAAGTCCCTCAACT  
GCAAATCTCAAATTTAGTTTTAGTTATATGCCATCAGAACAGAAGCATGAT  
AAATATATATACATGCCATCAGTTCCTCGCTTGGTGGTAAACAGGCATT  
ATCCAAGATGTTGTCTCTAGCTGAAGCTGACCATGTCTTCATGATTGGT  
CCTGGGATATCCCAAGGGTTCCTTTTCATTTCTAGAGCCTAGCGAGACAATT  
GGTACTGGCTGCCAGCCAGTGGCCCTACTTAGGGATTCCCCACCCAGGTG  
CCAAGCAGTGGAAATGACTCTAAACAGTGCCAGGCTGAGCTGTCTCTATTG  
CTTTTGCTTTTTAACCTGAAGCTGTGAACAGACTTACTCAAGCCATCAA  
AGAATGCTTTTTTTTTTCCCTGCAAAGCCCAATCAAATCATCTCTAGACTA  
GCAACCTCAGTTGTGTACCTGTACATGCCAAACCTATCCCAAGCTCTGC  
TTGTTTTATTTTAGGAAGCTGTTGAACCCCTGTTGTGTGGCTAGCTGAG  
CTTGGTGTCTGACTAAAGCACATTCCTTCATGTCAAATCACTTACAGT  
TTAACAGACGATTAGACATATAACTGTCAAAAATGAGCAGTATAGATGGTA  
AGTGCTCAGTTTAGGTTATTGTGTCATGGACTTTTTATTACCTTAATTT  
TGGGTAATTGCTATGAGTGGAAATGTAGACTTTTTATTTTTGTCTTTGAAA  
TAGTATCCTGGCTTAGTTTTTTCAGAAAGGAGATTTAAAATTACAGTTAGT  
GTTCAGTACTAACTTATGGCTTAATCCTCCAAAAGAAAGATTTTTTAAAA  
TATTTTCTTTATATGGGAAAACAGTTGTATTACATTTTGTTTTGGCATA  
AGTAAGATTTCTGTTTGCATTTTAGAATAATACTTAAAAACTGCCATGAA  
GAAGAAAACCACCTTAGGTAAATTGCTTGAATTTAATGAGAGAGATATAG  
TGCTCACTTGATACTTAGTTTTGCTTTAATTCCTTGTGTTTTTGTGAGGGT  
AAAAGCATGTCTACGAAGAAAAGTATGTGAACAGGAAGAAAAGTATGAAA exon 10  
TTCCTGAAGGTCCACGCAGAAGCA GTATT BARD1\_e10'  
TTCTTTTAATACAACCTTTCATTGTTCTTATTATGACATACTATTATTATC  
ACCATCAGGAAGAACCTTCTGCCCTTTC AACAGCTACAGGTGACTGATTAA  
AATTTAATTGTGCTTATTTCAAGCACTTGATTCTGAAAGATGATCACGA  
TGAGCAGTAAAATCCAGAAGGTAATAATTTCATACTGTTAATGGATTTTT  
GGCATCTTGAACATTTGCCATAAACCTTTCAGAATCTGAGGTAAATCTCAG  
ATACAGGAAGTAGCTTGAAGAAGACTTACAGCTGCTGCTTGGATTTAGT  
TACCATATGTCTCTATGGCCACATATTGTAGCTTTAATGGATAATATCGC  
ATTATCCTGTTGATATTATATAAGTATATTAGAAGTACAAAAGAAAATTT  
CCATAGAAGGGAATTATGAAACTTTTATTATTCCAACGAGCATAACGGAA  
GTATGTTTTCATAGCTAATTGGATCCCTAGCCTCAGCACAAAAATCTTTTG  
TGCCCCGTGAATACATTTCTGGAACCCTGGAGGGCACACCCCATGGTGG  
CTGCCCTGGAGACCTTAGGTTGGTAATATGTAAGGACCTGAATGTGGATG  
GGCAGAATTGGATAAAAAGTCCACGGAAAAGATGTTACTCTTGTAAATTTAA  
TAATGTTTAGCCTGGTGTCTCTGAAGCCTATTTCAAATAAGCTAGGAGTT  
GTGGAGGCTTTAAGTCCCACCAAATAAGCATAAACATCCTGATGAAAAAA  
GTTTGATGAATAGTTTGTTTTTTTCTTTTATACCAAGCATATCTAAAAATTT  
TAGAAGAGTGAAAAGGAACCGAGATGGTGAATCTTAGGGAAAAAAAT  
TGTAATAGGAAGCCCCTATTTGCCTAAGTATTTTTCTTGATCCAGTTAG  
TATGCTTGAATATAACTTGTCCCAGCACCTCATTAAGTAGCTTCTTAGC  
TGCTCATAATTGTTAcagatggagcattcctaataccaacatctaaaatgc  
tccaaaatccaaaactttttgagctttgacatgatgccacaagtggaaaa  
tccacacctgacctcatgtgacaggtcacggtcagaacacagtcaaat  
tttgtttcatgcacaaaattactgaagatattgtataaaaattacttcagg  
ctatgtgcataaggtgtacaagaacaaacgaattttggtttaggcttg  
agcctcatccttaagatacctcatgtatatgcaaattttccaaaacccaa  
aaaatttatgaaatctgaaatgcttctctccaaatgtttcaggttaaggga  
tattcaacttgTATTTTTATTTTCCCTCATTATACAGTGTTTTTGAAT  
ACAGTATTTTGATCTGCCTTTAACAAATGTTTTCTCATTATTTTCAAGTTGC exon 11

CAAAGCTGTTTGATGGATGCTACTTCTATTTGTGGGGAACCTTCAAACAC  
CATCCAAAGGACAACCTTATTAAGCTCGTCACTGCAGGTGGGGGCCAGAT  
CCTCAGTAGAAAGCCCAAGCCAGACA  
TCGCATACCATGCGAGACCCGATTCTGATCAGCGCTTCTGCACACAG  
TATATCATCTATGAAGATTTGTGTAATTATCACCCAGAGAGGGTTCGGCA  
GGGCAAAGTCTGGAAGGCTCCTTCGAGCTGGTTTATAGACTGTGTGATGT  
CCTTTGAGTTGCTTCCCTCTTGACAGCTGAATATTATACCAGATGAACATT  
TCAAATTGAATTTGCACGGTTTTGTGAGAGCCCAGTCATTGTAAGTTTTT  
AATGTTACATTTTTTACAAATAGGTAGAGTCATTTCATATTTGTCTTTGAA  
TCAAAAAAAAAAAAAAAAAAGTCTAATGCCAGATTAGGAATTCATGTTATGTT  
TACCATTTAGAAGCTGGGATTGCTTTTAAAGGTTTTTCTTTTTAAAATTG  
GCATGTTTTTGATTTATCATGTCTTTCTATTAGATTATTGGGTATCAA  
GATTAATGAGGACACCAGAATCTTGGTTAAATAGACAAGTGGTATCATT  
CTGTTTGAGTCTTTTAAATATTCTCCATACCTGCCACCAGTAAAAAACTT  
GCCttttttttttttttttttttAGTAAACAGAATATTATCAAACAATTT  
ATTTTGGCTTTATTGAAAAAAGAGTATTTGGTCTAAATGTGCCACCATAG  
GTGTTAAATTCTCCTATCTGCAATTGTCTTTATCCTATATTGTGTTTCATT  
TCTTTTCTTAATAATTTACTTTGTTGTGTGTTTTCTACACTTTCATCCCTG  
TTTTTTATCTTGTATATCATCAGGAAATTGTGATTTAATCATTAACATTG  
GTTTTTTTGTGTGTGTGGTAAAAATCAACACTAGGCTCATGGTACATATT  
TTTATTCTGTACATTTGCTTGTAACATCAATTTGTAACCTCTGTTTATCT  
ACTACATGTGTATATATACTTAGAGCATTCTCTAACACATTTAATGT  
TAGTATTTTTTAAAAGGCTGACCAGTCTAGCAAATTTGTCAGTCCAACGT  
CATTACTTTTTAAATTAAGAAGCAGTCTTCTTCTGGTAAACCTTGTGGTAT  
TTGTAATAAATTTGAAGGCTTAATTTCTTCTTTGTAAAAGGAAAAAG  
GTTTTTTTTTAAAGTTTTTAGGTTGGCATGGAGGCAGAAGTTGGTGATTAC  
TTGATTTACAACAGATTTTTTCCAGATCATACAAAAGGCCATACAGTAAG  
TATAGAAGTAGGTATGGGGAGGGCTTACTAATATCAAATAGGCAAGGCCT  
TAGTGAGTGGGCAGGATACCACCTGAGAGTGGCCAGATGTGGGGAGGTTA  
CTCTGCTCTGGGTGCTCTCATTTCATGAATCGACAAGGATACATTAGATTA  
TTTTGAAACATTTTTTTAAGAAGCAGAATTTCTTTATAATTCCTTCCTAG  
ACATTGAATATACTTATAAATTAAGACTTGGGGAAGGAGACACTGAGA  
GACTTGCCAGTTTGGTTCCCTCATGAACAAAAGAGGACAGTTTGATAACTA  
CCAGAATAGAATATCCCTAGTTTTTAAAATAGTGAGAATCTCTGAAGTTCA  
TCAACATCTTAAGATGCACCTTACTTGAAAGTTTGAGATTCTGTTTATCAT  
TTGAAAACACATTTTGCTTTAATTTCTTTCTTTGACATGTTGTTTTTTCAT  
ATCAAGAAATATATGAACAAAATAATAACCTTTTGACCCTGACCTTGCTG  
GGTGAATTAGCTCTGAAACACTCTCTACAACCAGTAATGCATTTGTCCCA  
CATTTTCATTCTGATAGAAAATGAACACCATAGCACCAAAACAAAAATCCGA  
GGCGTTAGATAATGTCTGGATTAATAATTTAAGACTCTCTAGGATTTTG  
GTTGTCATTTTTTATTTTATAACAGACTTTAAGTCACTTTCTGTTGCCTCA  
TAGGTACATTTTAGACAGGTTTGTGCTGTTTCTTGCATCTGAATTCCT  
GATTGTAAGACACCTATGAGGTCTCTTAGTTTTTGTTCATTTCATTTCTT  
GGTTTATCACCCCTCCCTTCTTTTTGTTGTTTTTCCCTGACTGTTAAGCA  
GTTTCATCTTTGCTTTTGTAAATATTTGACAGCAGTTAGTTTGTGTTAA  
GCTCTTGAAACTTGTGATTGTACTTTCTGTGTAGATATACATGTAATTAT  
TTTTTATTTTTCAATCATAGATTCAAGCTTCCTTCTTTTTTACCACAAAT  
CATTAAAGTTATTTGTGTTTCCATATACCTGTGTCTTGTATAAAATGGC  
TTATTCTGTGCTGTTGAATGAGGCTCAACATGACTTGGTGAGGAAGTCTA  
TTAACTAACAAAAGCTTATCTTTTTTAAACATAATGCTtttttaattaattt  
tgaataaaaaatatttCTAAAGTGTACTAGATACTTTATTACCTTAGATTA  
TTCCGAATACAGTATAACTTTGATAGTTTGAATAGTCATTAAGAAACAA  
TTACACACTGATTGCTTTGTGTCTCTAAAAGTGAGAGGCTGGTAGCTTTT  
CCACATTCTCATGGCTATTTTCTAGTTCTACTTGAATTTATAACTGTTT  
CCTTTTTCTTGCAGCTGCCACTTTGTAGCTATTTTTCTGTCTCTGCTA  
ATACTTTACCATATCTATCTCAATTTGTTTTTCTTTTACTTGTCTGAAAA  
ATAGAAACCAGATGGGAAGTATATTAGCATTATGATTGAAATAAGGGTAA  
ATGAGCAATGTGTGAAGGTTTTTCACTGACTTCACCTAAAAGATAGTTTAG  
CTACTTGAATTTTAGTAAATAGAATTTTTTCTTTTATTTTATCGGTCCCCC  
CACCTTTTTTTTTTTTTTGCACCTGCCTTGTAATTTAATAGTTAAGTGAC  
CTCTGCCTAGAGGATGATATTTGGGGAGGTTTGTGTTTCTGTGGGAAT  
AAGACGATTACAGGTGAGAGTGGGGCCACATTAGCTGTTATTGTTTCCA  
TGGGTCACTGTGGA  
AAATGCATTAATCATATTCTAAACGTTTCATGGGCCT  
CATTACAGTCACAATTGTCTATTCTGTTTCTACCCTGAACACATTAATA

BARD1\_e11

BARD1\_f3'



Supplementary Table S1

The MLPA probe set designed for the analysis of large mutations in the *BARD1* gene.

| probe          | 5' half-probe           |        |                |        |                                      |        | 3' half-probe |                                     |       |        |                                              |        | 5' HPL                      | 3' HPL | total probe length |    |     |
|----------------|-------------------------|--------|----------------|--------|--------------------------------------|--------|---------------|-------------------------------------|-------|--------|----------------------------------------------|--------|-----------------------------|--------|--------------------|----|-----|
|                | 5' PSS                  | length | 5' SS          | length | 5' TSS                               | length | 3' TSS        | length                              | 3' SS | length | 3' PSS                                       | length |                             |        |                    |    |     |
| ctrl_1 [chr22] | GGGTTCCCTAA<br>GGGTTGGA | 19     | cgctac         | 6      | GGCCAGATCACCGAGGA<br>GGA             | 21     | 75.6          | GGCAAAACTTCTGGCCCA<br>GAAG          | 22    | 71.0   | ac                                           | 2      | TCTAGATTGGATCT<br>TGCTGGCGC | 23     | 46                 | 47 | 93  |
| BARD1_e10'     | GGGTTCCCTAA<br>GGGTTGGA | 19     | cgctacta       | 8      | CTGAAGGTCCACGCAGAA<br>GCA            | 21     | 70.8          | GGCTCAACAGAGAACAGC<br>TGGTATT       | 25    | 69.1   |                                              | 0      | TCTAGATTGGATCT<br>TGCTGGCGC | 23     | 48                 | 48 | 96  |
| BARD1_e11      | GGGTTCCCTAA<br>GGGTTGGA | 19     | cgcta          | 5      | CTCAGTAGAAAGCCCAAG<br>CCAGACA        | 25     | 71.7          | GTGACGTGACTCAGACCA<br>TCAATACAG     | 27    | 70.5   |                                              | 0      | TCTAGATTGGATCT<br>TGCTGGCGC | 23     | 49                 | 50 | 99  |
| BARD1_f3'      | GGGTTCCCTAA<br>GGGTTGGA | 19     | cgctactac      | 9      | GTGAGAGTGGGGCCACAT<br>TAGCT          | 23     | 71.4          | GTTATTGTTTCCATGGGT<br>CAGTGTGGA     | 27    | 71.5   | c                                            | 1      | TCTAGATTGGATCT<br>TGCTGGCGC | 23     | 51                 | 51 | 102 |
| BARD1_f5'      | GGGTTCCCTAA<br>GGGTTGGA | 19     | cgctac         | 6      | CTGGGACCTGGATAGACA<br>CTTGGATAT      | 27     | 70.5          | CAGCTAGAAAGTACGAC<br>AGAAACCA       | 27    | 71.1   | tac                                          | 3      | TCTAGATTGGATCT<br>TGCTGGCGC | 23     | 52                 | 53 | 105 |
| BARD1_e02      | GGGTTCCCTAA<br>GGGTTGGA | 19     | cgc            | 3      | CAGTACTAACATCTGAG<br>AGAGCCTGTGTGT   | 32     | 71.5          | TAGGAGGATGTGAGCACA<br>TCTTCTGTAGG   | 29    | 71.3   | ac                                           | 2      | TCTAGATTGGATCT<br>TGCTGGCGC | 23     | 54                 | 54 | 108 |
| ctrl_2 [chr1]  | GGGTTCCCTAA<br>GGGTTGGA | 19     | cgctactactat   | 12     | CAGCTGGACGATACCAG<br>GAGCTT          | 24     | 72.8          | CTGGACATCAAGCTGGCC<br>CTG           | 21    | 72.7   | aactaaatct<br>ac                             | 12     | TCTAGATTGGATCT<br>TGCTGGCGC | 23     | 55                 | 56 | 111 |
| BARD1_e03      | GGGTTCCCTAA<br>GGGTTGGA | 19     | cgctacta       | 8      | CAACTGGACAGCATGATT<br>CAACTTTGTAGT   | 30     | 70.6          | AAGCTTCGAAATTTGCTA<br>CATGACAATGAGC | 31    | 71.1   | tac                                          | 3      | TCTAGATTGGATCT<br>TGCTGGCGC | 23     | 57                 | 57 | 114 |
| BARD1_e06      | GGGTTCCCTAA<br>GGGTTGGA | 19     | cgctactact     | 10     | GAATTATTGCTCCAGCAT<br>AAGGCATTGTT    | 29     | 71.4          | GAACACCACCGGGTATCA<br>AATATGCT      | 26    | 71.0   | ctaaatctac                                   | 10     | TCTAGATTGGATCT<br>TGCTGGCGC | 23     | 58                 | 59 | 117 |
| BARD1_e07      | GGGTTCCCTAA<br>GGGTTGGA | 19     | cgctactacta    | 11     | GAAAGTATGAAATCGCTA<br>TTGCTGTACCA    | 30     | 70.3          | GAGAAGAATGAATCATCC<br>TCAGCTAGCCA   | 29    | 71.9   | aaatctac                                     | 8      | TCTAGATTGGATCT<br>TGCTGGCGC | 23     | 60                 | 60 | 120 |
| BARD1_e09      | GGGTTCCCTAA<br>GGGTTGGA | 19     | cgctactactatta | 16     | ACTCATGTTGTTGTTCTC<br>GGTGATGCA      | 27     | 71.6          | GTTCAAAGTACCTTGAAG<br>CTTCAGTCTGGG  | 30    | 71.5   | taaatctac                                    | 9      | TCTAGATTGGATCT<br>TGCTGGCGC | 23     | 62                 | 62 | 124 |
| BARD1_e08      | GGGTTCCCTAA<br>GGGTTGGA | 19     | cgctactactatta | 24     | ACTGGGCAGCGTAGGGAT<br>GGA            | 21     | 71.8          | CCTCTTGACTTATAGGC<br>AGTGGGCTG      | 27    | 71.4   | caaaactaa<br>ctac                            | 14     | TCTAGATTGGATCT<br>TGCTGGCGC | 23     | 64                 | 64 | 128 |
| BARD1_e04.1    | GGGTTCCCTAA<br>GGGTTGGA | 19     | cgctactactatta | 18     | GTGGTTTAGCCCTCGAAG<br>TAAGAAAGTCA    | 29     | 71.5          | GATATGTTGTGAGTAAAG<br>CTTCAGTCTGGG  | 32    | 71.6   | aactaaatct<br>c                              | 11     | TCTAGATTGGATCT<br>TGCTGGCGC | 23     | 66                 | 66 | 132 |
| BARD1_e01''    | GGGTTCCCTAA<br>GGGTTGGA | 19     | cgctactactatta | 26     | TTTCTGGGGCGGCAGAA<br>TCTTT           | 23     | 72.3          | TCAAATCTCCGTTTCTC<br>CCTTCCG        | 25    | 71.3   | aatggctaaa<br>ctaaatctac                     | 20     | TCTAGATTGGATCT<br>TGCTGGCGC | 23     | 68                 | 68 | 136 |
| BARD1_e05      | GGGTTCCCTAA<br>GGGTTGGA | 19     | cgctactactatta | 19     | GCGACATACCTTCTGTTG<br>AATACCTTTTACAA | 32     | 70.5          | AATGGAAGTGATCCAAT<br>GTTAAAGACCATGC | 32    | 71.5   | tcaaactaaa<br>tctac                          | 15     | TCTAGATTGGATCT<br>TGCTGGCGC | 23     | 70                 | 70 | 140 |
| ctrl_3 [chr17] | GGGTTCCCTAA<br>GGGTTGGA | 19     | cgctactactatta | 26     | TCCTGCGCCATTGAGGT<br>CTATAAAAT       | 27     | 70.6          | TATAGAGAAAGTTGATTA<br>CCCCCGGATG    | 29    | 70.9   | aatggctaaa<br>ctaaatctac                     | 20     | TCTAGATTGGATCT<br>TGCTGGCGC | 23     | 72                 | 72 | 144 |
| BARD1_e04.2    | GGGTTCCCTAA<br>GGGTTGGA | 19     | cgctactactatta | 28     | GAGTGATGTCTAGTCCCT<br>CAGCAATGA      | 27     | 70.9          | AGCTGTGCCAATATGG<br>CTGTGAAA        | 26    | 71.6   | tatctaattg<br>tcaaactaaa<br>tctac            | 25     | TCTAGATTGGATCT<br>TGCTGGCGC | 23     | 74                 | 74 | 148 |
| ARID1A_e03     | GGGTTCCCTAA<br>GGGTTGGA | 19     | cgctactactatta | 35     | CAGTCTCAACCACCACAG<br>CTCC           | 22     | 71.0          | AGTCCCTCTCAGCCTCCAT<br>ACTCCC       | 24    | 70.7   | aatgtatcta<br>atggctaaac<br>taaatctac        | 29     | TCTAGATTGGATCT<br>TGCTGGCGC | 23     | 76                 | 76 | 152 |
| ARID1A_i01     | GGGTTCCCTAA<br>GGGTTGGA | 19     | cgctactactatta | 34     | AGCTTCCACTTCTGTGGA<br>CTGTTC         | 25     | 70.5          | AGGTGTGTGGTAGTAGTC<br>TAGGTGAGGG    | 28    | 70.9   | tgtatcta<br>ggctaaacta<br>aatctac            | 27     | TCTAGATTGGATCT<br>TGCTGGCGC | 23     | 78                 | 78 | 156 |
| ARID1A_e16     | GGGTTCCCTAA<br>GGGTTGGA | 19     | cgctactactatta | 40     | CCACAGCCGAATCTCATG<br>CCT            | 21     | 71.1          | TCCAACCAGACTCGGGG<br>ATG            | 21    | 72.6   | tttgcaaat<br>gtatcta<br>gtcaaactaa<br>atctac | 36     | TCTAGATTGGATCT<br>TGCTGGCGC | 23     | 80                 | 80 | 160 |

PSS – primer specific sequence, SS – stuffer sequence, TSS - target specific sequence, HPL – half probe length

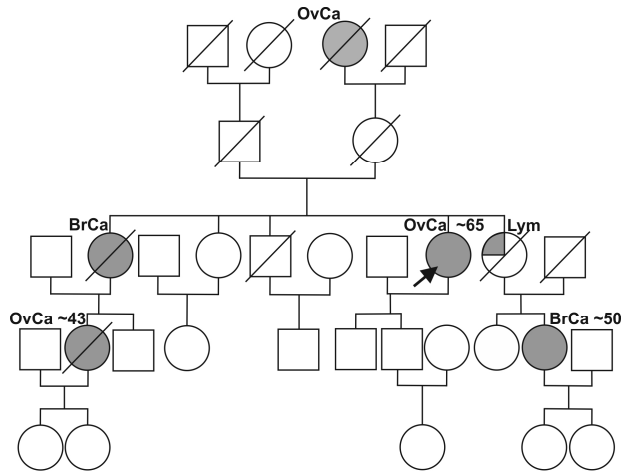

**Supplementary Figure S1** A pedigree of proband #53 (carrier of the c.1690C>T mutation), who is indicated by the arrow. The family members with breast or ovarian cancer are shown in grey. The circle that is  $\frac{1}{4}$  grey indicates a different cancer type. OvCa – ovarian cancer, BrCa – breast cancer, Lym – lymphoma. The numbers near the patient's cancer type indicate the age of diagnosis.
